# Supplementary material for: Provision of specific dental procedures by general dentists in the National Dental Practice-Based Research Network: questionnaire findings
Source: PubMed Central journal article supplement (PMC4324862; doi:10.1186/1472-6831-15-11), 2015-01-22
Supplement: 12903_2014_496_MOESM1_ESM.pdf [file 12903_2014_496_MOESM1_ESM.pdf]

**Additional file 1. Characteristics of enrolled practitioners, by practice type (as of January 25, 2013) [unabridged version]**

|                                                         |                        | Dentists                |                  |              |                        |              | Hygienists   |
|---------------------------------------------------------|------------------------|-------------------------|------------------|--------------|------------------------|--------------|--------------|
|                                                         |                        | Private vs. Non-Private |                  |              | General vs. Specialist |              |              |
| Characteristic                                          |                        | All                     | Private Practice | Non-Private  | General Practitioner   | Specialist   | All          |
| Overall                                                 |                        | 1427                    | 954              | 135          | 897                    | 193          | 443          |
| Number of different locations at which you see patients |                        |                         |                  |              |                        |              |              |
|                                                         | 1                      | 1160 (81.4%)            | 801 (84.0%)      | 92 (68.1%)   | 774 (86.3%)            | 120 (62.2%)  | 311 (70.2%)  |
|                                                         | 2                      | 195 (13.7%)             | 118 (12.4%)      | 30 (22.2%)   | 96 (10.7%)             | 52 (26.9%)   | 85 (19.2%)   |
|                                                         | 3                      | 43 ( 3.0%)              | 22 ( 2.3%)       | 6 ( 4.4%)    | 16 ( 1.8%)             | 12 ( 6.2%)   | 15 ( 3.4%)   |
|                                                         | More than 3            | 27 ( 1.9%)              | 13 ( 1.4%)       | 7 ( 5.2%)    | 11 ( 1.2%)             | 9 ( 4.7%)    | 32 ( 7.2%)   |
|                                                         | Total                  | 1425 (100.0%)           | 954 (100.0%)     | 135 (100.0%) | 897 (100.0%)           | 193 (100.0%) | 443 (100.0%) |
|                                                         | Missing/Blank          | 2                       | 0                | 0            | 0                      | 0            | 0            |
| Gender                                                  |                        |                         |                  |              |                        |              |              |
|                                                         | Male                   | 1026 (72.7%)            | 697 (73.8%)      | 79 (59.8%)   | 637 (71.6%)            | 143 (76.1%)  | 10 ( 2.3%)   |
|                                                         | Female                 | 385 (27.3%)             | 247 (26.2%)      | 53 (40.2%)   | 253 (28.4%)            | 45 (23.9%)   | 432 (97.7%)  |
|                                                         | Total                  | 1411 (100.0%)           | 944 (100.0%)     | 132 (100.0%) | 890 (100.0%)           | 188 (100.0%) | 442 (100.0%) |
|                                                         | Missing/Blank          | 16                      | 10               | 3            | 7                      | 5            | 1            |
| Mean age                                                |                        |                         |                  |              |                        |              |              |
|                                                         | Mean (S.D.)            | 50 (11.7)               | 50.3 (11.3)      | 48.5 (12.3)  | 49.7 (11.5)            | 51.8 (10.6)  | 43.6 (11.1)  |
| Hispanic/Latino                                         |                        |                         |                  |              |                        |              |              |
|                                                         | Yes                    | 71 ( 5.0%)              | 39 ( 4.1%)       | 19 (14.4%)   | 38 ( 4.3%)             | 20 (10.5%)   | 47 (10.7%)   |
|                                                         | No                     | 1338 (95.0%)            | 902 (95.9%)      | 113 (85.6%)  | 847 (95.7%)            | 170 (89.5%)  | 393 (89.3%)  |
|                                                         | Total                  | 1409 (100.0%)           | 941 (100.0%)     | 132 (100.0%) | 885 (100.0%)           | 190 (100.0%) | 440 (100.0%) |
|                                                         | Missing/Blank          | 18                      | 13               | 3            | 12                     | 3            | 3            |
| Race                                                    |                        |                         |                  |              |                        |              |              |
|                                                         | White/Caucasian        | 1175 (83.6%)            | 792 (84.0%)      | 100 (76.9%)  | 730 (82.5%)            | 164 (86.3%)  | 392 (89.1%)  |
|                                                         | Black/African-American | 51 ( 3.6%)              | 33 ( 3.5%)       | 7 ( 5.4%)    | 36 ( 4.1%)             | 5 ( 2.6%)    | 20 ( 4.5%)   |

**Additional file 1. Characteristics of enrolled practitioners, by practice type (as of January 25, 2013) [unabridged version]**

|                                               |                                        | Dentists                |                  |              |                        |              | Hygienists   |
|-----------------------------------------------|----------------------------------------|-------------------------|------------------|--------------|------------------------|--------------|--------------|
|                                               |                                        | Private vs. Non-Private |                  |              | General vs. Specialist |              |              |
| Characteristic                                |                                        | All                     | Private Practice | Non-Private  | General Practitioner   | Specialist   | All          |
|                                               | American Indian/Alaska Native          | 4 (0.3%)                | 4 (0.4%)         | 0 (0.0%)     | 4 (0.5%)               | 0 (0.0%)     | 2 (0.5%)     |
|                                               | Asian                                  | 133 (9.5%)              | 82 (8.7%)        | 21 (16.2%)   | 85 (9.6%)              | 17 (8.9%)    | 13 (3.0%)    |
|                                               | Native Hawaiian/Pacific Islander       | 1 (0.1%)                | 1 (0.1%)         | 0 (0.0%)     | 1 (0.1%)               | 0 (0.0%)     | 2 (0.5%)     |
|                                               | Other                                  | 42 (3.0%)               | 31 (3.3%)        | 2 (1.5%)     | 29 (3.3%)              | 4 (2.1%)     | 11 (2.5%)    |
|                                               | Total                                  | 1406 (100.0%)           | 943 (100.0%)     | 130 (100.0%) | 885 (100.0%)           | 190 (100.0%) | 440 (100.0%) |
|                                               | Missing/Blank                          | 21                      | 11               | 5            | 12                     | 3            | 3            |
| Practice location                             |                                        |                         |                  |              |                        |              |              |
|                                               | Inner City of Urban Area               | 193 (13.6%)             | 81 (8.5%)        | 46 (34.3%)   | 100 (11.2%)            | 28 (14.6%)   | 97 (22.0%)   |
|                                               | Urban (not inner city)                 | 424 (29.9%)             | 285 (30.0%)      | 49 (36.6%)   | 266 (29.7%)            | 66 (34.4%)   | 101 (23.0%)  |
|                                               | Suburban                               | 602 (42.4%)             | 466 (49.0%)      | 13 (9.7%)    | 393 (43.9%)            | 89 (46.4%)   | 181 (41.1%)  |
|                                               | Rural                                  | 200 (14.1%)             | 119 (12.5%)      | 26 (19.4%)   | 136 (15.2%)            | 9 (4.7%)     | 61 (13.9%)   |
|                                               | Total                                  | 1419 (100.0%)           | 951 (100.0%)     | 134 (100.0%) | 895 (100.0%)           | 192 (100.0%) | 440 (100.0%) |
|                                               | Missing/Blank                          | 8                       | 3                | 1            | 2                      | 1            | 3            |
| Hours in practice                             |                                        |                         |                  |              |                        |              |              |
|                                               | 32 or more hours                       | 1137 (80.8%)            | 815 (86.4%)      | 69 (52.3%)   | 750 (84.7%)            | 136 (70.8%)  | 280 (63.8%)  |
|                                               | Less than 32 hours                     | 271 (19.2%)             | 128 (13.6%)      | 63 (47.7%)   | 135 (15.3%)            | 56 (29.2%)   | 159 (36.2%)  |
|                                               | Total                                  | 1408 (100.0%)           | 943 (100.0%)     | 132 (100.0%) | 885 (100.0%)           | 192 (100.0%) | 439 (100.0%) |
|                                               | Missing/Blank                          | 19                      | 11               | 3            | 12                     | 1            | 4            |
| How long a patient has to wait<br>Mean (S.D.) |                                        |                         |                  |              |                        |              |              |
|                                               | For a new patient exam appt. (days)    | 8.1 (13.3)              | 6.8 (9.7)        | 19.5 (29.5)  | 7.9 (14.0)             | 10.3 (15.5)  | 12.1 (45.3)  |
|                                               | For a treatment procedure appt. (days) | 8.2 (13.5)              | 7.1 (9.2)        | 17.3 (31.2)  | 7.9 (14.5)             | 10.1 (12.2)  | 8.5 (21.0)   |
|                                               | In the waiting room (mins)             | 8.2 (8.2)               | 7.6 (8.4)        | 11.7 (9.8)   | 8.0 (8.9)              | 8.4 (7.2)    | 8.8 (9.1)    |

**Additional file 1. Characteristics of enrolled practitioners, by practice type (as of January 25, 2013) [unabridged version]**

|                                                                         |                                                       | Dentists                |                  |             |                        |             | Hygienists  |
|-------------------------------------------------------------------------|-------------------------------------------------------|-------------------------|------------------|-------------|------------------------|-------------|-------------|
|                                                                         |                                                       | Private vs. Non-Private |                  |             | General vs. Specialist |             |             |
| Characteristic                                                          |                                                       | All                     | Private Practice | Non-Private | General Practitioner   | Specialist  | All         |
| Percentage of patients who are Mean (S.D.)                              |                                                       |                         |                  |             |                        |             |             |
|                                                                         | 1-18 years old                                        | 22.6 (23.7)             | 22.6 (22.5)      | 23.7 (30.0) | 18.3 (15.2)            | 43.4 (39.4) | 19.8 (19.6) |
|                                                                         | 19-44 years old                                       | 27.6 (12.7)             | 27.2 (11.2)      | 28.7 (17.0) | 28.8 (11.2)            | 20.9 (14.0) | 28.2 (13.4) |
|                                                                         | 45-64 years old                                       | 32.9 (13.3)             | 32.9 (12.2)      | 33.8 (17.5) | 33.8 (11.3)            | 28.6 (19.4) | 32.7 (12.9) |
|                                                                         | 65 or older                                           | 20.1 (12.1)             | 19.8 (11.0)      | 20.9 (16.2) | 20.1 (11.1)            | 18.3 (14.9) | 21.8 (14.5) |
| Percentage of patients who are of Hispanic/Latino ethnicity Mean (S.D.) |                                                       |                         |                  |             |                        |             |             |
|                                                                         | Hispanic                                              | 15.3 (18.4)             | 14.4 (17.1)      | 28.1 (27.4) | 15.4 (19.2)            | 18.1 (18.5) | 20.1 (19.4) |
| Percentage of patients whose race is Mean (S.D.)                        |                                                       |                         |                  |             |                        |             |             |
|                                                                         | White/Caucasian                                       | 66.4 (22.8)             | 68.0 (21.8)      | 55.2 (26.5) | 66.7 (23.2)            | 65.7 (20.2) | 64.0 (23.1) |
|                                                                         | Black/African-American                                | 16.8 (16.2)             | 16.1 (15.8)      | 20.3 (19.6) | 16.9 (16.9)            | 15.1 (13.6) | 16.4 (14.6) |
|                                                                         | American Indian/Alaska Native                         | 2.9 (9.5)               | 1.8 (3.3)        | 9.3 (24.2)  | 2.7 (9.1)              | 2.6 (9.6)   | 4.1 (10.0)  |
|                                                                         | Asian                                                 | 8.5 (9.3)               | 8.8 (9.6)        | 9.1 (8.6)   | 8.3 (8.9)              | 10.8 (11.5) | 7.7 (8.9)   |
|                                                                         | Native Hawaiian/Pacific Islander                      | 1.4 (2.9)               | 1.4 (2.7)        | 1.9 (4.0)   | 1.4 (2.8)              | 1.5 (3.4)   | 2.2 (5.6)   |
|                                                                         | Other                                                 | 15.3 (21.4)             | 14.2 (19.9)      | 27.2 (30.7) | 15.3 (21.9)            | 17.8 (21.5) | 15.5 (18.2) |
| Percentage of patients who are Mean (S.D.)                              |                                                       |                         |                  |             |                        |             |             |
|                                                                         | Covered by a private insurance program                | 60.7 (24.2)             | 63.9 (20.9)      | 41.8 (33.0) | 61.3 (23.4)            | 61.9 (24.6) | 58.8 (29.1) |
|                                                                         | Covered by a public program                           | 17.7 (24.1)             | 14.2 (19.4)      | 37.0 (34.2) | 16.6 (23.0)            | 18.4 (23.5) | 18.6 (27.0) |
|                                                                         | Not covered by any third party and pays out of pocket | 22.7 (17.2)             | 22.9 (16.4)      | 18.1 (19.6) | 22.5 (16.6)            | 21.8 (17.8) | 20.3 (18.9) |

**Additional file 1. Characteristics of enrolled practitioners, by practice type (as of January 25, 2013) [unabridged version]**

|                                                                                                         |                                                                             | Dentists                |                  |              |                        |              | Hygienists   |
|---------------------------------------------------------------------------------------------------------|-----------------------------------------------------------------------------|-------------------------|------------------|--------------|------------------------|--------------|--------------|
|                                                                                                         |                                                                             | Private vs. Non-Private |                  |              | General vs. Specialist |              |              |
| Characteristic                                                                                          |                                                                             | All                     | Private Practice | Non-Private  | General Practitioner   | Specialist   | All          |
|                                                                                                         | Receiving free care or substantially reduced fees courtesy of this practice | 5.1 (12.7)              | 3.0 (4.4)        | 19.6 (29.8)  | 5.3 (13.2)             | 3.6 (6.1)    | 8.9 (21.3)   |
| Percent patients who come<br>Mean (S.D.)                                                                |                                                                             |                         |                  |              |                        |              |              |
|                                                                                                         | For one visit only                                                          | 10.2 (14.4)             | 9.2 (13.0)       | 16.3 (18.9)  | 8.6 (9.4)              | 17.2 (25.7)  | 8.7 (11.2)   |
|                                                                                                         | Occasionally only when they have an emergency or specific problem           | 13.0 (11.5)             | 12.5 (10.8)      | 16.9 (14.1)  | 13.1 (9.1)             | 12.3 (18.8)  | 11.4 (9.4)   |
|                                                                                                         | Irregularly whether or not they have a problem                              | 15.9 (10.9)             | 15.6 (9.8)       | 18.9 (15.2)  | 16.7 (10.1)            | 12.2 (12.7)  | 15.7 (10.9)  |
|                                                                                                         | Regularly as recommended or whether or not they have a problem              | 63.3 (20.5)             | 64.7 (18.7)      | 54.4 (25.3)  | 62.6 (18.5)            | 68.0 (25.2)  | 64.9 (19.2)  |
| Internet access in practice                                                                             |                                                                             |                         |                  |              |                        |              |              |
|                                                                                                         | Access for administrative staff                                             | 1332 (93.3%)            | 891 (93.4%)      | 126 (93.3%)  | 838 (93.4%)            | 182 (94.3%)  | 400 (90.3%)  |
|                                                                                                         | Access in the operatories                                                   | 890 (62.4%)             | 587 (61.5%)      | 93 (68.9%)   | 554 (61.8%)            | 126 (65.3%)  | 290 (65.5%)  |
|                                                                                                         | Access for clinical staff outside operatories                               | 1162 (81.4%)            | 777 (81.4%)      | 111 (82.2%)  | 732 (81.6%)            | 158 (81.9%)  | 300 (67.7%)  |
|                                                                                                         | Wireless internet access                                                    | 896 (62.8%)             | 596 (62.5%)      | 85 (63.0%)   | 543 (60.5%)            | 138 (71.5%)  | 226 (51.0%)  |
|                                                                                                         | None                                                                        | 29 (2.0%)               | 20 (2.1%)        | 3 (2.2%)     | 20 (2.2%)              | 3 (1.6%)     | 13 (2.9%)    |
| Uses electronic patient records to manage clinical/patient care data (as opposed to billing/scheduling) |                                                                             |                         |                  |              |                        |              |              |
|                                                                                                         | Yes                                                                         | 825 (58.2%)             | 494 (51.8%)      | 97 (72.9%)   | 477 (53.2%)            | 116 (60.7%)  | 297 (67.7%)  |
|                                                                                                         | No                                                                          | 592 (41.8%)             | 459 (48.2%)      | 36 (27.1%)   | 420 (46.8%)            | 75 (39.3%)   | 142 (32.3%)  |
|                                                                                                         | Total                                                                       | 1417 (100.0%)           | 953 (100.0%)     | 133 (100.0%) | 897 (100.0%)           | 191 (100.0%) | 439 (100.0%) |

**Additional file 1. Characteristics of enrolled practitioners, by practice type (as of January 25, 2013) [unabridged version]**

|                                                                                                             |                       | Dentists                |                  |             |                        |              | Hygienists   |
|-------------------------------------------------------------------------------------------------------------|-----------------------|-------------------------|------------------|-------------|------------------------|--------------|--------------|
|                                                                                                             |                       | Private vs. Non-Private |                  |             | General vs. Specialist |              |              |
| Characteristic                                                                                              |                       | All                     | Private Practice | Non-Private | General Practitioner   | Specialist   | All          |
|                                                                                                             | Missing/Blank         | 10                      | 1                | 2           | 0                      | 2            | 4            |
| Brand of electronic patient records software                                                                |                       |                         |                  |             |                        |              |              |
|                                                                                                             | Dentrix               | 265 (32.3%)             | 173 (35.2%)      | 15 (15.5%)  | 173 (36.3%)            | 14 (12.3%)   | 129 (43.4%)  |
|                                                                                                             | Soft Dent             | 32 ( 3.9%)              | 22 ( 4.5%)       | 0 ( 0.0%)   | 21 ( 4.4%)             | 1 ( 0.9%)    | 22 ( 7.4%)   |
|                                                                                                             | Eagle Soft            | 150 (18.3%)             | 102 (20.7%)      | 5 ( 5.2%)   | 96 (20.1%)             | 11 ( 9.6%)   | 65 (21.9%)   |
|                                                                                                             | Eagle Dental          | 3 ( 0.4%)               | 2 ( 0.4%)        | 0 ( 0.0%)   | 1 ( 0.2%)              | 1 ( 0.9%)    | 1 ( 0.3%)    |
|                                                                                                             | Practice Works        | 44 ( 5.4%)              | 35 ( 7.1%)       | 0 ( 0.0%)   | 30 ( 6.3%)             | 5 ( 4.4%)    | 11 ( 3.7%)   |
|                                                                                                             | GSD Works             | 25 ( 3.0%)              | 18 ( 3.7%)       | 0 ( 0.0%)   | 16 ( 3.4%)             | 2 ( 1.8%)    | 5 ( 1.7%)    |
|                                                                                                             | Axium                 | 86 (10.5%)              | 21 ( 4.3%)       | 44 (45.4%)  | 40 ( 8.4%)             | 25 (21.9%)   | 17 ( 5.7%)   |
|                                                                                                             | Other                 | 216 (26.3%)             | 119 (24.2%)      | 33 (34.0%)  | 100 (21.0%)            | 55 (48.2%)   | 47 (15.8%)   |
|                                                                                                             | Total                 | 821 (100.0%)            | 492 (100.0%)     | 97 (100.0%) | 477 (100.0%)           | 114 (100.0%) | 297 (100.0%) |
|                                                                                                             | Missing/Blank/NA      | 606                     | 462              | 38          | 420                    | 79           | 146          |
| Of non-EDR users in the next 2 years how likely are you to begin using EDR to manage clinical patient data? |                       |                         |                  |             |                        |              |              |
|                                                                                                             | Very likely           | 234 (39.5%)             | 178 (38.8%)      | 19 (52.8%)  | 173 (41.2%)            | 24 (32.0%)   | 43 (30.5%)   |
|                                                                                                             | Somewhat likely       | 178 (30.1%)             | 137 (29.8%)      | 10 (27.8%)  | 115 (27.4%)            | 32 (42.7%)   | 38 (27.0%)   |
|                                                                                                             | Not likely            | 110 (18.6%)             | 90 (19.6%)       | 3 ( 8.3%)   | 79 (18.8%)             | 14 (18.7%)   | 32 (22.7%)   |
|                                                                                                             | Not sure              | 70 (11.8%)              | 54 (11.8%)       | 4 (11.1%)   | 53 (12.6%)             | 5 ( 6.7%)    | 28 (19.9%)   |
|                                                                                                             | Total                 | 592 (100.0%)            | 459 (100.0%)     | 36 (100.0%) | 420 (100.0%)           | 75 (100.0%)  | 141 (100.0%) |
|                                                                                                             | Missing/Blank/NA      | 835                     | 495              | 99          | 477                    | 118          | 302          |
| Desired level of network participation                                                                      |                       |                         |                  |             |                        |              |              |
|                                                                                                             | Informational         | 114 ( 8.0%)             | 71 ( 7.5%)       | 13 ( 9.8%)  | 67 ( 7.5%)             | 16 ( 8.3%)   | 29 ( 6.6%)   |
|                                                                                                             | Limited participation | 304 (21.5%)             | 177 (18.7%)      | 23 (17.3%)  | 166 (18.6%)            | 35 (18.2%)   | 144 (32.6%)  |

**Additional file 1. Characteristics of enrolled practitioners, by practice type (as of January 25, 2013) [unabridged version]**

|                                       |                                                                                                         | Dentists                |                  |               |                        |               | Hygienists   |
|---------------------------------------|---------------------------------------------------------------------------------------------------------|-------------------------|------------------|---------------|------------------------|---------------|--------------|
|                                       |                                                                                                         | Private vs. Non-Private |                  |               | General vs. Specialist |               |              |
| Characteristic                        |                                                                                                         | All                     | Private Practice | Non-Private   | General Practitioner   | Specialist    | All          |
|                                       | Full participation                                                                                      | 999 (70.5%)             | 701 (73.9%)      | 97 (72.9%)    | 659 (73.9%)            | 141 (73.4%)   | 269 (60.9%)  |
|                                       | Total                                                                                                   | 1417 (100.0%)           | 949 (100.0%)     | 133 (100.0%)  | 892 (100.0%)           | 192 (100.0%)  | 442 (100.0%) |
|                                       | Missing/Blank                                                                                           | 10                      | 5                | 2             | 5                      | 1             | 1            |
| Type of main practice                 |                                                                                                         |                         |                  |               |                        |               |              |
|                                       | Owner of private practice                                                                               | 916 (64.6%)             | 714 (74.8%)      | 0 (0.0%)      | 595 (66.7%)            | 118 (61.1%)   |              |
|                                       | Associate or employee of a private practice                                                             | 176 (12.4%)             | 134 (14.0%)      | 0 (0.0%)      | 111 (12.4%)            | 23 (11.9%)    |              |
|                                       | HealthPartners Dental Group                                                                             | 56 (4.0%)               | 44 (4.6%)        | 0 (0.0%)      | 38 (4.3%)              | 5 (2.6%)      |              |
|                                       | Permanente Dental Associates                                                                            | 53 (3.7%)               | 48 (5.0%)        | 0 (0.0%)      | 44 (4.9%)              | 3 (1.6%)      |              |
|                                       | Other managed care or preferred provider organization                                                   | 16 (1.1%)               | 14 (1.5%)        | 0 (0.0%)      | 13 (1.5%)              | 1 (0.5%)      |              |
|                                       | Public health practice, community health center, or publicly-funded clinic (but not a federal facility) | 58 (4.1%)               | 0 (0.0%)         | 38 (28.1%)    | 38 (4.3%)              | 0 (0.0%)      |              |
|                                       | Federal government facility (VA, DoD, Public Health Service)                                            | 24 (1.7%)               | 0 (0.0%)         | 18 (13.3%)    | 16 (1.8%)              | 2 (1.0%)      |              |
|                                       | Dental school, academic institution, or facility staffed by dental school                               | 118 (8.3%)              | 0 (0.0%)         | 79 (58.5%)    | 37 (4.1%)              | 41 (21.2%)    |              |
|                                       | Total                                                                                                   | 1417 (100.0%)           | 954 (100.0%)     | 135 (100.0%)  | 892 (100.0%)           | 193 (100.0%)  |              |
|                                       | Missing/Blank                                                                                           | 10                      | 0                | 0             | 5                      | 0             |              |
| Year of graduation from dental school |                                                                                                         |                         |                  |               |                        |               |              |
|                                       | Graduation year Mean (S.D.)                                                                             | 1989.4 (12.0)           | 1989.2 (11.7)    | 1990.9 (12.1) | 1989.9 (11.9)          | 1987.1 (10.5) |              |

**Additional file 1. Characteristics of enrolled practitioners, by practice type (as of January 25, 2013) [unabridged version]**

|                                    |                                                 | Dentists                |                  |              |                        |              | Hygienists |
|------------------------------------|-------------------------------------------------|-------------------------|------------------|--------------|------------------------|--------------|------------|
|                                    |                                                 | Private vs. Non-Private |                  |              | General vs. Specialist |              |            |
| Characteristic                     |                                                 | All                     | Private Practice | Non-Private  | General Practitioner   | Specialist   | All        |
| Country of dental school graduates |                                                 |                         |                  |              |                        |              |            |
|                                    | United States                                   | 1349 (94.9%)            | 928 (97.5%)      | 103 (76.3%)  | 865 (96.4%)            | 169 (88.0%)  |            |
|                                    | Canada                                          | 9 (0.6%)                | 6 (0.6%)         | 1 (0.7%)     | 3 (0.3%)               | 4 (2.1%)     |            |
|                                    | Other                                           | 63 (4.4%)               | 18 (1.9%)        | 31 (23.0%)   | 29 (3.2%)              | 19 (9.9%)    |            |
|                                    | Total                                           | 1421 (100.0%)           | 952 (100.0%)     | 135 (100.0%) | 897 (100.0%)           | 192 (100.0%) |            |
|                                    | Missing/Blank                                   | 6                       | 2                | 0            | 0                      | 1            |            |
| Type of dentist                    |                                                 |                         |                  |              |                        |              |            |
|                                    | General Dentist                                 | 1148 (80.9%)            | 801 (84.2%)      | 91 (67.9%)   | 897 (100%)             | 0 (0.0%)     |            |
|                                    | Specialist                                      | 271 (19.1%)             | 150 (15.8%)      | 43 (32.1%)   | 0 (0.0%)               | 193 (100%)   |            |
|                                    |                                                 | 1419 (100.0%)           | 951 (100.0%)     | 134 (100.0%) | 897 (100.0%)           | 193 (100.0%) |            |
|                                    | Missing/Blank                                   | 8                       | 3                | 1            | 0                      | 0            |            |
| Among general dentists             |                                                 |                         |                  |              |                        |              |            |
|                                    | No formal advanced training after dental school |                         |                  |              | 387 (43.1%)            |              |            |
|                                    | Completed an AEGD program                       |                         |                  |              | 94 (10.5%)             |              |            |
|                                    | Completed a GPR program                         |                         |                  |              | 199 (22.2%)            |              |            |
|                                    | FAGD                                            |                         |                  |              | 129 (14.4%)            |              |            |
|                                    | MAGD                                            |                         |                  |              | 67 (7.5%)              |              |            |
|                                    | Completed some other type of advanced training  |                         |                  |              | 188 (21.0%)            |              |            |
| Among dental specialists           |                                                 |                         |                  |              |                        |              |            |
|                                    | Endodontist                                     |                         |                  |              |                        | 23 (11.9%)   |            |
|                                    | Pediatric dentist                               |                         |                  |              |                        | 43 (22.3%)   |            |
|                                    | Periodontist                                    |                         |                  |              |                        | 45 (23.3%)   |            |

**Additional file 1. Characteristics of enrolled practitioners, by practice type (as of January 25, 2013) [unabridged version]**

|                                                                     |                                      | Dentists                |                  |              |                        |              | Hygienists |
|---------------------------------------------------------------------|--------------------------------------|-------------------------|------------------|--------------|------------------------|--------------|------------|
|                                                                     |                                      | Private vs. Non-Private |                  |              | General vs. Specialist |              |            |
| Characteristic                                                      |                                      | All                     | Private Practice | Non-Private  | General Practitioner   | Specialist   | All        |
|                                                                     | Prosthodontist                       |                         |                  |              |                        | 16 ( 8.3%)   |            |
|                                                                     | Oral & maxillofacial surgeon         |                         |                  |              |                        | 11 ( 5.7%)   |            |
|                                                                     | Orthodontist                         |                         |                  |              |                        | 46 (23.8%)   |            |
|                                                                     | Other                                |                         |                  |              |                        | 19 ( 9.8%)   |            |
| Member of                                                           |                                      |                         |                  |              |                        |              |            |
|                                                                     | American Dental Association          | 1133 (79.4%)            | 776 (81.3%)      | 100 (74.1%)  | 716 (79.8%)            | 163 (84.5%)  |            |
|                                                                     | Academy of General Dentistry         | 474 (33.2%)             | 344 (36.1%)      | 24 (17.8%)   | 361 (40.2%)            | 8 ( 4.1%)    |            |
| Patient visits per week                                             |                                      |                         |                  |              |                        |              |            |
|                                                                     | Number of patient visits Mean (S.D.) | 45.7 (34.9)             | 47.6 (32.9)      | 31.3 (27.4)  | 42.3 (21.5)            | 61.1 (60.2)  |            |
| Frequency of performing the following procedures in a typical month |                                      |                         |                  |              |                        |              |            |
| Nonimplant restorative                                              | Not at all                           | 176 (12.5%)             | 97 (10.3%)       | 31 (23.5%)   | 20 ( 2.2%)             | 107 (57.8%)  |            |
|                                                                     | Occasionally                         | 42 ( 3.0%)              | 19 ( 2.0%)       | 10 ( 7.6%)   | 15 ( 1.7%)             | 14 ( 7.6%)   |            |
|                                                                     | Routinely                            | 1189 (84.5%)            | 828 (87.7%)      | 91 (68.9%)   | 857 (96.1%)            | 64 (34.6%)   |            |
|                                                                     | Total                                | 1407 (100.0%)           | 944 (100.0%)     | 132 (100.0%) | 892 (100.0%)           | 185 (100.0%) |            |
|                                                                     | Missing/Blank                        | 20                      | 10               | 3            | 5                      | 8            |            |
| Implants (prosthetic and surgical procedures)                       |                                      |                         |                  |              |                        |              |            |
|                                                                     | Not at all                           | 617 (44.1%)             | 391 (41.6%)      | 80 (61.5%)   | 359 (40.5%)            | 112 (60.9%)  |            |
|                                                                     | Occasionally                         | 469 (33.5%)             | 325 (34.6%)      | 26 (20.0%)   | 339 (38.3%)            | 14 ( 7.6%)   |            |
|                                                                     | Routinely                            | 313 (22.4%)             | 223 (23.7%)      | 24 (18.5%)   | 188 (21.2%)            | 58 (31.5%)   |            |
|                                                                     | Total                                | 1399 (100.0%)           | 939 (100.0%)     | 130 (100.0%) | 886 (100.0%)           | 184 (100.0%) |            |
|                                                                     | Missing/Blank                        | 28                      | 15               | 5            | 11                     | 9            |            |



**Additional file 1. Characteristics of enrolled practitioners, by practice type (as of January 25, 2013) [unabridged version]**

|                                         |               | Dentists                |                  |              |                        |              | Hygienists |
|-----------------------------------------|---------------|-------------------------|------------------|--------------|------------------------|--------------|------------|
|                                         |               | Private vs. Non-Private |                  |              | General vs. Specialist |              |            |
| Characteristic                          |               | All                     | Private Practice | Non-Private  | General Practitioner   | Specialist   | All        |
|                                         |               |                         |                  |              |                        |              |            |
| Removable prosthetics                   | Not at all    | 270 (19.3%)             | 153 (16.3%)      | 51 (38.6%)   | 58 ( 6.5%)             | 145 (80.1%)  |            |
|                                         | Occasionally  | 499 (35.6%)             | 351 (37.3%)      | 33 (25.0%)   | 368 (41.3%)            | 18 ( 9.9%)   |            |
|                                         | Routinely     | 633 (45.1%)             | 436 (46.4%)      | 48 (36.4%)   | 466 (52.2%)            | 18 ( 9.9%)   |            |
|                                         | Total         | 1402 (100.0%)           | 940 (100.0%)     | 132 (100.0%) | 892 (100.0%)           | 181 (100.0%) |            |
|                                         | Missing/Blank | 25                      | 14               | 3            | 5                      | 12           |            |
|                                         |               |                         |                  |              |                        |              |            |
| Extractions (surgical and non-surgical) | Not at all    | 151 (10.8%)             | 76 ( 8.1%)       | 29 (22.5%)   | 42 ( 4.7%)             | 62 (33.7%)   |            |
|                                         | Occasionally  | 394 (28.2%)             | 274 (29.1%)      | 24 (18.6%)   | 263 (29.7%)            | 36 (19.6%)   |            |
|                                         | Routinely     | 854 (61.0%)             | 590 (62.8%)      | 76 (58.9%)   | 581 (65.6%)            | 86 (46.7%)   |            |
|                                         | Total         | 1399 (100.0%)           | 940 (100.0%)     | 129 (100.0%) | 886 (100.0%)           | 184 (100.0%) |            |
|                                         | Missing/Blank | 28                      | 14               | 6            | 11                     | 9            |            |
|                                         |               |                         |                  |              |                        |              |            |
| Periodontal therapy (nonsurgical)       | Not at all    | 642 (45.8%)             | 422 (44.9%)      | 54 (41.2%)   | 370 (41.6%)            | 106 (57.9%)  |            |
|                                         | Occasionally  | 464 (33.1%)             | 318 (33.8%)      | 39 (29.8%)   | 326 (36.7%)            | 31 (16.9%)   |            |
|                                         | Routinely     | 295 (21.1%)             | 200 (21.3%)      | 38 (29.0%)   | 193 (21.7%)            | 46 (25.1%)   |            |
|                                         | Total         | 1401 (100.0%)           | 940 (100.0%)     | 131 (100.0%) | 889 (100.0%)           | 183 (100.0%) |            |
|                                         | Missing/Blank | 26                      | 14               | 4            | 8                      | 10           |            |
|                                         |               |                         |                  |              |                        |              |            |
| Periodontal therapy (surgical)          | Not at all    | 957 (68.9%)             | 631 (67.4%)      | 94 (72.3%)   | 606 (68.6%)            | 120 (65.6%)  |            |
|                                         | Occasionally  | 321 (23.1%)             | 235 (25.1%)      | 20 (15.4%)   | 238 (26.9%)            | 17 ( 9.3%)   |            |
|                                         | Routinely     | 111 ( 8.0%)             | 70 ( 7.5%)       | 16 (12.3%)   | 40 ( 4.5%)             | 46 (25.1%)   |            |
|                                         | Total         | 1389 (100.0%)           | 936 (100.0%)     | 130 (100.0%) | 884 (100.0%)           | 183 (100.0%) |            |
|                                         | Missing/Blank | 38                      | 18               | 5            | 13                     | 10           |            |

**Additional file 1. Characteristics of enrolled practitioners, by practice type (as of January 25, 2013) [unabridged version]**

|                                          |               | Dentists                |                  |              |                        |              | Hygienists |
|------------------------------------------|---------------|-------------------------|------------------|--------------|------------------------|--------------|------------|
|                                          |               | Private vs. Non-Private |                  |              | General vs. Specialist |              |            |
| Characteristic                           |               | All                     | Private Practice | Non-Private  | General Practitioner   | Specialist   | All        |
|                                          |               |                         |                  |              |                        |              |            |
| Endodontic therapy (anteriors/premolars) | Not at all    | 371 (26.4%)             | 208 (22.1%)      | 59 (44.7%)   | 132 (14.8%)            | 134 (72.4%)  |            |
|                                          | Occasionally  | 322 (22.9%)             | 202 (21.4%)      | 37 (28.0%)   | 219 (24.6%)            | 21 (11.4%)   |            |
|                                          | Routinely     | 711 (50.6%)             | 533 (56.5%)      | 36 (27.3%)   | 540 (60.6%)            | 30 (16.2%)   |            |
|                                          | Total         | 1404 (100.0%)           | 943 (100.0%)     | 132 (100.0%) | 891 (100.0%)           | 185 (100.0%) |            |
|                                          | Missing/Blank | 23                      | 11               | 3            | 6                      | 8            |            |
|                                          |               |                         |                  |              |                        |              |            |
| Endodontic therapy (molars)              | Not at all    | 618 (44.1%)             | 365 (38.8%)      | 88 (67.2%)   | 317 (35.6%)            | 136 (74.3%)  |            |
|                                          | Occasionally  | 336 (24.0%)             | 247 (26.2%)      | 24 (18.3%)   | 255 (28.7%)            | 18 (9.8%)    |            |
|                                          | Routinely     | 446 (31.9%)             | 329 (35.0%)      | 19 (14.5%)   | 318 (35.7%)            | 29 (15.8%)   |            |
|                                          | Total         | 1400 (100.0%)           | 941 (100.0%)     | 131 (100.0%) | 890 (100.0%)           | 183 (100.0%) |            |
|                                          | Missing/Blank | 27                      | 13               | 4            | 7                      | 10           |            |
|                                          |               |                         |                  |              |                        |              |            |
| Procedures for esthetic reasons only     | Not at all    | 226 (16.1%)             | 111 (11.8%)      | 47 (35.6%)   | 41 (4.6%)              | 116 (63.7%)  |            |
|                                          | Occasionally  | 473 (33.7%)             | 316 (33.5%)      | 46 (34.8%)   | 334 (37.4%)            | 31 (17.0%)   |            |
|                                          | Routinely     | 706 (50.2%)             | 516 (54.7%)      | 39 (29.5%)   | 519 (58.1%)            | 35 (19.2%)   |            |
|                                          | Total         | 1405 (100.0%)           | 943 (100.0%)     | 132 (100.0%) | 894 (100.0%)           | 182 (100.0%) |            |
|                                          | Missing/Blank | 22                      | 11               | 3            | 3                      | 11           |            |
|                                          |               |                         |                  |              |                        |              |            |
| Orthodontic treatment                    | Not at all    | 975 (69.5%)             | 629 (66.9%)      | 112 (85.5%)  | 637 (71.8%)            | 103 (55.7%)  |            |
|                                          | Occasionally  | 252 (18.0%)             | 185 (19.7%)      | 11 (8.4%)    | 173 (19.5%)            | 25 (13.5%)   |            |
|                                          | Routinely     | 175 (12.5%)             | 126 (13.4%)      | 8 (6.1%)     | 77 (8.7%)              | 57 (30.8%)   |            |
|                                          | Total         | 1402 (100.0%)           | 940 (100.0%)     | 131 (100.0%) | 887 (100.0%)           | 185 (100.0%) |            |
|                                          | Missing/Blank | 25                      | 14               | 4            | 10                     | 8            |            |

**Additional file 1. Characteristics of enrolled practitioners, by practice type (as of January 25, 2013) [unabridged version]**

|                                                      |                                        | Dentists                |                  |             |                        |            | Hygienists    |
|------------------------------------------------------|----------------------------------------|-------------------------|------------------|-------------|------------------------|------------|---------------|
|                                                      |                                        | Private vs. Non-Private |                  |             | General vs. Specialist |            |               |
| Characteristic                                       |                                        | All                     | Private Practice | Non-Private | General Practitioner   | Specialist | All           |
| Educational setting for your dental hygiene training |                                        |                         |                  |             |                        |            |               |
|                                                      | Technical or community college         |                         |                  |             |                        |            | 203 (46.1%)   |
|                                                      | Four-year college                      |                         |                  |             |                        |            | 179 (40.7%)   |
|                                                      | Alabama Dental Hygiene Program         |                         |                  |             |                        |            | 25 ( 5.7%)    |
|                                                      | Other                                  |                         |                  |             |                        |            | 33 ( 7.5%)    |
|                                                      | Total                                  |                         |                  |             |                        |            | 440 (100.0%)  |
|                                                      | Missing/Blank                          |                         |                  |             |                        |            | 3             |
| Year at which became licensed as a dental hygienist  |                                        |                         |                  |             |                        |            |               |
|                                                      | Year licensed - Mean (S.D.)            |                         |                  |             |                        |            | 1994.7 (12.6) |
| Highest degree obtained                              |                                        |                         |                  |             |                        |            |               |
|                                                      | Certificate                            |                         |                  |             |                        |            | 30 ( 6.8%)    |
|                                                      | Associate                              |                         |                  |             |                        |            | 188 (42.6%)   |
|                                                      | Baccalaureate                          |                         |                  |             |                        |            | 160 (36.3%)   |
|                                                      | Masters                                |                         |                  |             |                        |            | 49 (11.1%)    |
|                                                      | PhD                                    |                         |                  |             |                        |            | 5 ( 1.1%)     |
|                                                      | Other                                  |                         |                  |             |                        |            | 9 ( 2.0%)     |
|                                                      | Total                                  |                         |                  |             |                        |            | 441 (100.0%)  |
|                                                      | Missing/Blank                          |                         |                  |             |                        |            | 2             |
| Member of:                                           |                                        |                         |                  |             |                        |            |               |
|                                                      | American Dental Hygienists Association |                         |                  |             |                        |            | 183 (41.3%)   |

**Additional file 1. Characteristics of enrolled practitioners, by practice type (as of January 25, 2013) [unabridged version]**

|                                                                            |                                         | Dentists                |                  |             |                        |            | Hygienists  |
|----------------------------------------------------------------------------|-----------------------------------------|-------------------------|------------------|-------------|------------------------|------------|-------------|
|                                                                            |                                         | Private vs. Non-Private |                  |             | General vs. Specialist |            |             |
| Characteristic                                                             |                                         | All                     | Private Practice | Non-Private | General Practitioner   | Specialist | All         |
| Percentage of patients you personally perform this procedure - Mean (S.D.) |                                         |                         |                  |             |                        |            |             |
|                                                                            | Prophylaxis                             |                         |                  |             |                        |            | 73.1 (28.6) |
|                                                                            | Periodontal therapy                     |                         |                  |             |                        |            | 38.2 (33.5) |
|                                                                            | Subgingival antimicrobial placement     |                         |                  |             |                        |            | 17.6 (30.7) |
|                                                                            | Restorative functions                   |                         |                  |             |                        |            | 0.9 ( 7.5)  |
|                                                                            | Local anesthesia (injection)            |                         |                  |             |                        |            | 8.3 (18.2)  |
|                                                                            | Local anesthesia (subgingival with gel) |                         |                  |             |                        |            | 16.2 (26.5) |
|                                                                            | Dental sealants                         |                         |                  |             |                        |            | 20.3 (29.7) |
|                                                                            | Dentinal desensitizers                  |                         |                  |             |                        |            | 22.2 (30.2) |
|                                                                            | Radiographs                             |                         |                  |             |                        |            | 65.8 (31.2) |
|                                                                            | Patient education (in-office)           |                         |                  |             |                        |            | 83.1 (28.3) |
|                                                                            | Tobacco cessation counseling            |                         |                  |             |                        |            | 25.2 (31.5) |
|                                                                            | Dietary counseling                      |                         |                  |             |                        |            | 34.9 (36.1) |
|                                                                            | Other                                   |                         |                  |             |                        |            | 26.0 (39.5) |
