# Supplementary material for: Provision of specific dental procedures by general dentists in the National Dental Practice-Based Research Network: questionnaire findings
Source: PubMed Central journal article supplement (PMC4324862; doi:10.1186/1472-6831-15-11), 2015-01-22
Supplement: 12903_2014_496_MOESM2_ESM.pdf [file 12903_2014_496_MOESM2_ESM.pdf]

## Additional file 2. Frequency of provision of procedure types, by dentist, practice, and patient characteristics

Frequency of provision of three of the five 'very common' procedure types, by dentist, practice, and patient characteristics <sup>a,b</sup>

| Characteristic of the dentist, practice, or patient population | Non-implant restorative procedures |              |             |       | Esthetic procedures |              |             |        | Extractions |              |             |        |
|----------------------------------------------------------------|------------------------------------|--------------|-------------|-------|---------------------|--------------|-------------|--------|-------------|--------------|-------------|--------|
|                                                                | None                               | Occasionally | Routinely   | Total | None                | Occasionally | Routinely   | Total  | None        | Occasionally | Routinely   | Total  |
| Dentist gender                                                 |                                    |              |             |       |                     |              |             |        |             |              |             |        |
| Male                                                           | 34 (2.0)                           | 33 (1.9)     | 1629 (96.0) | 1696  | 65 (3.8)            | 573 (33.7)   | 1062 (62.5) | 1700   | 82 (4.8)    | 498 (29.4)   | 1112 (65.7) | 1692   |
| Female                                                         | 15 (2.4)                           | 8 (1.3)      | 593 (96.3)  | 616   | 44 (7.1)            | 258 (41.8)   | 315 (51.1)  | 617    | 36 (5.9)    | 226 (36.7)   | 353 (57.4)  | 615    |
| Missing/Blank                                                  | 0                                  | 0            | 11          | 55    | 0                   | 4            | 7           | 50     | 1           | 2            | 8           | 60     |
| P-value                                                        |                                    |              |             | 0.491 |                     |              |             | <.0001 |             |              |             | 0.001  |
| Dentist age in years                                           |                                    |              |             |       |                     |              |             |        |             |              |             |        |
| Mean (S.D.)                                                    | 53.9 (13.6)                        | 55.2 (13.8)  | 51.0 (11.9) |       | 50.1 (14.0)         | 48.8 (12.6)  | 52.6 (11.3) |        | 55.1 (12.1) | 52.5 (11.6)  | 50.1 (12.1) |        |
| P-value                                                        |                                    |              |             | 0.023 |                     |              |             | <.0001 |             |              |             | <.0001 |
| Dentist Hispanic/Latino ethnicity                              |                                    |              |             |       |                     |              |             |        |             |              |             |        |
| Yes                                                            | 5 (4.2)                            | 0 (0.0)      | 113 (95.8)  | 118   | 5 (4.3)             | 48 (41.0)    | 64 (54.7)   | 117    | 3 (2.5)     | 36 (30.5)    | 79 (66.9)   | 118    |
| No                                                             | 44 (2.0)                           | 40 (1.8)     | 2094 (96.1) | 2178  | 102 (4.7)           | 780 (35.7)   | 1302 (59.6) | 2184   | 115 (5.3)   | 681 (31.3)   | 1378 (63.4) | 2174   |
| Missing/Blank                                                  | 0                                  | 1            | 26          | 71    | 2                   | 7            | 18          | 66     | 1           | 9            | 16          | 75     |
| P-value                                                        |                                    |              |             | 0.099 |                     |              |             | 0.510  |             |              |             | 0.429  |
| Dentist race                                                   |                                    |              |             |       |                     |              |             |        |             |              |             |        |
| White/Caucasian                                                | 36 (1.9)                           | 30 (1.6)     | 1868 (96.6) | 1934  | 83 (4.3)            | 693 (35.7)   | 1163 (60.0) | 1939   | 108 (5.6)   | 636 (33.0)   | 1185 (61.4) | 1929   |
| Black/African-American                                         | 4 (3.6)                            | 6 (5.4)      | 101 (91.0)  | 111   | 8 (7.1)             | 34 (30.4)    | 70 (62.5)   | 112    | 2 (1.8)     | 15 (13.4)    | 95 (84.8)   | 112    |
| American Indian/Alaska Native                                  | 1 (16.7)                           | 0 (0.0)      | 5 (83.3)    | 6     | 1 (16.7)            | 4 (66.7)     | 1 (16.7)    | 6      | 2 (33.3)    | 2 (33.3)     | 2 (33.3)    | 6      |
| Asian                                                          | 4 (2.3)                            | 4 (2.3)      | 167 (95.4)  | 175   | 10 (5.7)            | 65 (37.1)    | 100 (57.1)  | 175    | 3 (1.7)     | 45 (25.7)    | 127 (72.6)  | 175    |
| Native Hawaiian/Pacific Islander                               | 1 (50.0)                           | 0 (0.0)      | 1 (50.0)    | 2     | 1 (50.0)            | 0 (0.0)      | 1 (50.0)    | 2      | 1 (50.0)    | 0 (0.0)      | 1 (50.0)    | 2      |
| Other                                                          | 3 (4.5)                            | 0 (0.0)      | 64 (95.5)   | 67    | 4 (6.1)             | 25 (37.9)    | 37 (56.1)   | 66     | 2 (3.0)     | 19 (28.4)    | 46 (68.7)   | 67     |
| Missing/Blank                                                  | 0                                  | 1            | 27          | 72    | 2                   | 14           | 12          | 67     | 1           | 9            | 17          | 76     |
| P-value                                                        |                                    |              |             | 0.003 |                     |              |             | 0.071  |             |              |             | <.0001 |
| Year of graduation from dental school                          |                                    |              |             |       |                     |              |             |        |             |              |             |        |
| Mean (S.D.)                                                    | 1986 (13.0)                        | 1986 (14.1)  | 1990 (12.4) |       | 1991 (14.4)         | 1992 (12.9)  | 1988 (11.8) |        | 1985 (12.0) | 1988 (12.1)  | 1991 (12.5) |        |
| P-value                                                        |                                    |              |             | 0.030 |                     |              |             | <.0001 |             |              |             | <.0001 |

| Characteristic of the dentist, practice, or patient population | Non-implant restorative procedures |              |             |       | Esthetic procedures |              |             |        | Extractions |              |             |       |
|----------------------------------------------------------------|------------------------------------|--------------|-------------|-------|---------------------|--------------|-------------|--------|-------------|--------------|-------------|-------|
|                                                                | None                               | Occasionally | Routinely   | Total | None                | Occasionally | Routinely   | Total  | None        | Occasionally | Routinely   | Total |
| After dental school: No formal training program                |                                    |              |             |       |                     |              |             |        |             |              |             |       |
| Yes                                                            | 11 ( 1.1)                          | 14 ( 1.4)    | 990 (97.5)  | 1015  | 45 ( 4.4)           | 418 (41.1)   | 555 (54.5)  | 1018   | 46 ( 4.5)   | 330 (32.6)   | 635 (62.8)  | 1011  |
| No                                                             | 38 ( 2.9)                          | 27 ( 2.1)    | 1243 (95.0) | 1308  | 64 ( 4.9)           | 417 (31.8)   | 829 (63.3)  | 1310   | 73 ( 5.6)   | 396 (30.3)   | 838 (64.1)  | 1307  |
| Missing/Blank                                                  | 0                                  | 0            | 0           | 44    | 0                   | 0            | 0           | 39     | 0           | 0            | 0           | 49    |
| P-value                                                        |                                    |              |             | 0.003 |                     |              |             | <.0001 |             |              |             | 0.311 |
| After dental school: Completed an AEGD program                 |                                    |              |             |       |                     |              |             |        |             |              |             |       |
| Yes                                                            | 5 ( 2.3)                           | 4 ( 1.8)     | 213 (95.9)  | 222   | 11 ( 5.0)           | 83 (37.4)    | 128 (57.7)  | 222    | 11 ( 5.0)   | 62 (28.1)    | 148 (67.0)  | 221   |
| No                                                             | 44 ( 2.1)                          | 37 ( 1.8)    | 2020 (96.1) | 2101  | 98 ( 4.7)           | 752 (35.7)   | 1256 (59.6) | 2106   | 108 ( 5.2)  | 664 (31.7)   | 1325 (63.2) | 2097  |
| Missing/Blank                                                  | 0                                  | 0            | 0           | 44    | 0                   | 0            | 0           | 39     | 0           | 0            | 0           | 49    |
| P-value                                                        |                                    |              |             | 0.919 |                     |              |             | 0.833  |             |              |             | 0.534 |
| After dental school: Completed a GPR program                   |                                    |              |             |       |                     |              |             |        |             |              |             |       |
| Yes                                                            | 10 ( 2.0)                          | 8 ( 1.6)     | 494 (96.5)  | 512   | 24 ( 4.7)           | 185 (35.9)   | 306 (59.4)  | 515    | 20 ( 3.9)   | 150 (29.2)   | 343 (66.9)  | 513   |
| No                                                             | 39 ( 2.2)                          | 33 ( 1.8)    | 1739 (96.0) | 1811  | 85 ( 4.7)           | 650 (35.9)   | 1078 (59.5) | 1813   | 99 ( 5.5)   | 576 (31.9)   | 1130 (62.6) | 1805  |
| Missing/Blank                                                  | 0                                  | 0            | 0           | 44    | 0                   | 0            | 0           | 39     | 0           | 0            | 0           | 49    |
| P-value                                                        |                                    |              |             | 0.944 |                     |              |             | 1.000  |             |              |             | 0.138 |
| After dental school: I am a FAGD                               |                                    |              |             |       |                     |              |             |        |             |              |             |       |
| Yes                                                            | 4 ( 1.2)                           | 7 ( 2.2)     | 313 (96.6)  | 324   | 8 ( 2.5)            | 89 (27.5)    | 227 (70.1)  | 324    | 18 ( 5.6)   | 107 (33.0)   | 199 (61.4)  | 324   |
| No                                                             | 45 ( 2.3)                          | 34 ( 1.7)    | 1920 (96.0) | 1999  | 101 ( 5.0)          | 746 (37.2)   | 1157 (57.7) | 2004   | 101 ( 5.1)  | 619 (31.0)   | 1274 (63.9) | 1994  |
| Missing/Blank                                                  | 0                                  | 0            | 0           | 44    | 0                   | 0            | 0           | 39     | 0           | 0            | 0           | 49    |
| P-value                                                        |                                    |              |             | 0.405 |                     |              |             | 0.001  |             |              |             | 0.670 |
| After dental school: Completed MAGD                            |                                    |              |             |       |                     |              |             |        |             |              |             |       |
| Yes                                                            | 2 ( 1.5)                           | 1 ( 0.8)     | 129 (97.7)  | 132   | 2 ( 1.5)            | 35 (26.5)    | 95 (72.0)   | 132    | 4 ( 3.0)    | 46 (34.8)    | 82 (62.1)   | 132   |
| No                                                             | 47 ( 2.1)                          | 40 ( 1.8)    | 2104 (96.0) | 2191  | 107 ( 4.9)          | 800 (36.4)   | 1289 (58.7) | 2196   | 115 ( 5.3)  | 680 (31.1)   | 1391 (63.6) | 2186  |
| Missing/Blank                                                  | 0                                  | 0            | 0           | 44    | 0                   | 0            | 0           | 39     | 0           | 0            | 0           | 49    |
| P-value                                                        |                                    |              |             | 0.871 |                     |              |             | 0.007  |             |              |             | 0.459 |

| Characteristic of the dentist, practice, or patient population | Non-implant restorative procedures |              |             |        | Esthetic procedures |              |             |        | Extractions |              |             |        |
|----------------------------------------------------------------|------------------------------------|--------------|-------------|--------|---------------------|--------------|-------------|--------|-------------|--------------|-------------|--------|
|                                                                | None                               | Occasionally | Routinely   | Total  | None                | Occasionally | Routinely   | Total  | None        | Occasionally | Routinely   | Total  |
| After dental school: Completed some other training program     |                                    |              |             |        |                     |              |             |        |             |              |             |        |
| Yes                                                            | 24 ( 4.7)                          | 12 ( 2.4)    | 473 (92.9)  | 509    | 35 ( 6.9)           | 135 (26.5)   | 339 (66.6)  | 509    | 39 ( 7.7)   | 152 (30.0)   | 316 (62.3)  | 507    |
| No                                                             | 25 ( 1.4)                          | 29 ( 1.6)    | 1760 (97.0) | 1814   | 74 ( 4.1)           | 700 (38.5)   | 1045 (57.4) | 1819   | 80 ( 4.4)   | 574 (31.7)   | 1157 (63.9) | 1811   |
| Missing/Blank                                                  | 0                                  | 0            | 0           | 44     | 0                   | 0            | 0           | 39     | 0           | 0            | 0           | 49     |
| P-value                                                        |                                    |              |             | <.0001 |                     |              |             | <.0001 |             |              |             | 0.018  |
| Member of: American Dental Association                         |                                    |              |             |        |                     |              |             |        |             |              |             |        |
| Yes                                                            | 30 ( 1.6)                          | 30 ( 1.6)    | 1767 (96.7) | 1827   | 64 ( 3.5)           | 641 (35.0)   | 1126 (61.5) | 1831   | 90 ( 4.9)   | 595 (32.6)   | 1138 (62.4) | 1823   |
| No                                                             | 19 ( 3.8)                          | 11 ( 2.2)    | 466 (94.0)  | 496    | 45 ( 9.1)           | 194 (39.0)   | 258 (51.9)  | 497    | 29 ( 5.9)   | 131 (26.5)   | 335 (67.7)  | 495    |
| Missing/Blank                                                  | 0                                  | 0            | 0           | 44     | 0                   | 0            | 0           | 39     | 0           | 0            | 0           | 49     |
| P-value                                                        |                                    |              |             | 0.010  |                     |              |             | <.0001 |             |              |             | 0.028  |
| Member of: Academy of General Dentistry                        |                                    |              |             |        |                     |              |             |        |             |              |             |        |
| Yes                                                            | 9 ( 1.0)                           | 16 ( 1.8)    | 855 (97.2)  | 880    | 23 ( 2.6)           | 291 (33.0)   | 568 (64.4)  | 882    | 40 ( 4.5)   | 283 (32.2)   | 557 (63.3)  | 880    |
| No                                                             | 40 ( 2.8)                          | 25 ( 1.7)    | 1378 (95.5) | 1443   | 86 ( 5.9)           | 544 (37.6)   | 816 (56.4)  | 1446   | 79 ( 5.5)   | 443 (30.8)   | 916 (63.7)  | 1438   |
| Missing/Blank                                                  | 0                                  | 0            | 0           | 44     | 0                   | 0            | 0           | 39     | 0           | 0            | 0           | 49     |
| P-value                                                        |                                    |              |             | 0.011  |                     |              |             | <.0001 |             |              |             | 0.539  |
| Hours in practice in patient contact                           |                                    |              |             |        |                     |              |             |        |             |              |             |        |
| 32 or more hours                                               | 20 ( 1.0)                          | 26 ( 1.3)    | 1884 (97.6) | 1930   | 65 ( 3.4)           | 676 (35.0)   | 1191 (61.6) | 1932   | 75 ( 3.9)   | 567 (29.4)   | 1284 (66.7) | 1926   |
| Less than 32 hours                                             | 29 ( 7.8)                          | 15 ( 4.0)    | 330 (88.2)  | 374    | 44 (11.7)           | 151 (40.2)   | 181 (48.1)  | 376    | 44 (11.8)   | 153 (41.0)   | 176 (47.2)  | 373    |
| Missing/Blank                                                  | 0                                  | 0            | 19          | 63     | 0                   | 8            | 12          | 59     | 0           | 6            | 13          | 68     |
| P-value                                                        |                                    |              |             | <.0001 |                     |              |             | <.0001 |             |              |             | <.0001 |
| Number of different locations at which you see patients        |                                    |              |             |        |                     |              |             |        |             |              |             |        |
| 1 location                                                     | 36 ( 1.8)                          | 27 ( 1.4)    | 1910 (96.8) | 1973   | 72 ( 3.6)           | 707 (35.8)   | 1198 (60.6) | 1977   | 106 ( 5.4)  | 652 (33.1)   | 1214 (61.6) | 1972   |
| 2 locations                                                    | 5 ( 1.8)                           | 9 ( 3.2)     | 263 (94.9)  | 277    | 23 ( 8.3)           | 96 (34.5)    | 159 (57.2)  | 278    | 8 ( 2.9)    | 65 (23.6)    | 202 (73.5)  | 275    |
| 3 locations                                                    | 2 ( 4.7)                           | 3 ( 7.0)     | 38 (88.4)   | 43     | 6 (14.0)            | 18 (41.9)    | 19 (44.2)   | 43     | 2 ( 4.9)    | 3 ( 7.3)     | 36 (87.8)   | 41     |
| More than 3                                                    | 6 (20.0)                           | 2 ( 6.7)     | 22 (73.3)   | 30     | 8 (26.7)            | 14 (46.7)    | 8 (26.7)    | 30     | 3 (10.0)    | 6 (20.0)     | 21 (70.0)   | 30     |
| Missing/Blank                                                  | 0                                  | 0            | 0           | 44     | 0                   | 0            | 0           | 39     | 0           | 0            | 0           | 49     |
| P-value                                                        |                                    |              |             | <.0001 |                     |              |             | <.0001 |             |              |             | <.0001 |

| Characteristic of the dentist, practice, or patient population                                          | Non-implant restorative procedures |              |             |        | Esthetic procedures |              |             |        | Extractions |              |             |        |
|---------------------------------------------------------------------------------------------------------|------------------------------------|--------------|-------------|--------|---------------------|--------------|-------------|--------|-------------|--------------|-------------|--------|
|                                                                                                         | None                               | Occasionally | Routinely   | Total  | None                | Occasionally | Routinely   | Total  | None        | Occasionally | Routinely   | Total  |
| Practice location                                                                                       |                                    |              |             |        |                     |              |             |        |             |              |             |        |
| Inner City of Urban Area                                                                                | 13 (4.7)                           | 6 (2.2)      | 255 (93.1)  | 274    | 26 (9.4)            | 93 (33.7)    | 157 (56.9)  | 276    | 19 (7.0)    | 64 (23.4)    | 190 (69.6)  | 273    |
| Urban (not inner city)                                                                                  | 23 (3.6)                           | 10 (1.5)     | 614 (94.9)  | 647    | 37 (5.7)            | 251 (38.7)   | 361 (55.6)  | 649    | 43 (6.7)    | 227 (35.2)   | 375 (58.1)  | 645    |
| Suburban                                                                                                | 9 (0.9)                            | 14 (1.4)     | 998 (97.7)  | 1021   | 26 (2.5)            | 341 (33.4)   | 654 (64.1)  | 1021   | 46 (4.5)    | 365 (35.9)   | 607 (59.6)  | 1018   |
| Rural                                                                                                   | 4 (1.1)                            | 10 (2.7)     | 357 (96.2)  | 371    | 20 (5.4)            | 148 (39.8)   | 204 (54.8)  | 372    | 10 (2.7)    | 68 (18.3)    | 294 (79.0)  | 372    |
| Missing/Blank                                                                                           | 0                                  | 1            | 9           | 54     | 0                   | 2            | 8           | 49     | 1           | 2            | 7           | 59     |
| P-value                                                                                                 |                                    |              |             | <.0001 |                     |              |             | <.0001 |             |              |             | <.0001 |
| Type of main practice (full)                                                                            |                                    |              |             |        |                     |              |             |        |             |              |             |        |
| Owner of private practice                                                                               | 17 (1.0)                           | 17 (1.0)     | 1613 (97.9) | 1647   | 24 (1.5)            | 514 (31.2)   | 1109 (67.3) | 1647   | 71 (4.3)    | 561 (34.2)   | 1009 (61.5) | 1641   |
| Associate or employee of a private practice                                                             | 7 (2.2)                            | 8 (2.5)      | 302 (95.3)  | 317    | 22 (6.9)            | 128 (40.1)   | 169 (53.0)  | 319    | 18 (5.7)    | 101 (32.0)   | 197 (62.3)  | 316    |
| HealthPartners Dental Group                                                                             | 2 (4.0)                            | 1 (2.0)      | 47 (94.0)   | 50     | 3 (5.9)             | 32 (62.7)    | 16 (31.4)   | 51     | 0 (0.0)     | 6 (12.0)     | 44 (88.0)   | 50     |
| Permanente Dental Associates                                                                            | 1 (1.6)                            | 1 (1.6)      | 61 (96.8)   | 63     | 4 (6.3)             | 47 (74.6)    | 12 (19.0)   | 63     | 1 (1.6)     | 11 (17.5)    | 51 (81.0)   | 63     |
| Other managed care or preferred provider organization                                                   | 0 (0.0)                            | 1 (5.9)      | 16 (94.1)   | 17     | 2 (11.8)            | 6 (35.3)     | 9 (52.9)    | 17     | 0 (0.0)     | 5 (29.4)     | 12 (70.6)   | 17     |
| Public health practice, community health center, or publicly-funded clinic (but not a federal facility) | 7 (6.0)                            | 7 (6.0)      | 102 (87.9)  | 116    | 30 (25.4)           | 56 (47.5)    | 32 (27.1)   | 118    | 3 (2.5)     | 15 (12.7)    | 100 (84.7)  | 118    |
| Federal government facility (VA, DoD, Public Health Service)                                            | 0 (0.0)                            | 2 (5.1)      | 37 (94.9)   | 39     | 7 (17.9)            | 15 (38.5)    | 17 (43.6)   | 39     | 2 (5.1)     | 11 (28.2)    | 26 (66.7)   | 39     |
| Dental school, academic institution, or facility staffed by dental school                               | 15 (22.4)                          | 3 (4.5)      | 49 (73.1)   | 67     | 17 (25.4)           | 33 (49.3)    | 17 (25.4)   | 67     | 22 (32.8)   | 14 (20.9)    | 31 (46.3)   | 67     |
| Missing/Blank                                                                                           | 0                                  | 1            | 6           | 51     | 0                   | 4            | 3           | 46     | 2           | 2            | 3           | 56     |
| P-value                                                                                                 |                                    |              |             | <.0001 |                     |              |             | <.0001 |             |              |             | <.0001 |
| Type of main practice (private)                                                                         |                                    |              |             |        |                     |              |             |        |             |              |             |        |
| Private                                                                                                 | 27 (1.3)                           | 28 (1.3)     | 2039 (97.4) | 2094   | 55 (2.6)            | 727 (34.7)   | 1315 (62.7) | 2097   | 90 (4.3)    | 684 (32.8)   | 1313 (62.9) | 2087   |
| Non private                                                                                             | 22 (9.9)                           | 12 (5.4)     | 188 (84.7)  | 222    | 54 (24.1)           | 104 (46.4)   | 66 (29.5)   | 224    | 27 (12.1)   | 40 (17.9)    | 157 (70.1)  | 224    |
| Missing/Blank                                                                                           | 0                                  | 1            | 6           | 51     | 0                   | 4            | 3           | 46     | 2           | 2            | 3           | 56     |
| P-value                                                                                                 |                                    |              |             | <.0001 |                     |              |             | <.0001 |             |              |             | <.0001 |
| At the same location: Not applicable-only GDs at this location                                          |                                    |              |             |        |                     |              |             |        |             |              |             |        |
| Yes                                                                                                     | 23 (1.2)                           | 30 (1.6)     | 1879 (97.3) | 1932   | 65 (3.4)            | 687 (35.5)   | 1182 (61.1) | 1934   | 77 (4.0)    | 619 (32.1)   | 1231 (63.9) | 1927   |

| Characteristic of the dentist, practice, or patient population | Non-implant restorative procedures |              |             |        | Esthetic procedures |              |             |        | Extractions |              |             |        |
|----------------------------------------------------------------|------------------------------------|--------------|-------------|--------|---------------------|--------------|-------------|--------|-------------|--------------|-------------|--------|
|                                                                | None                               | Occasionally | Routinely   | Total  | None                | Occasionally | Routinely   | Total  | None        | Occasionally | Routinely   | Total  |
| No                                                             | 26 (6.6)                           | 11 (2.8)     | 354 (90.5)  | 391    | 44 (11.2)           | 148 (37.6)   | 202 (51.3)  | 394    | 42 (10.7)   | 107 (27.4)   | 242 (61.9)  | 391    |
| Missing/Blank                                                  | 0                                  | 0            | 0           | 44     | 0                   | 0            | 0           | 39     | 0           | 0            | 0           | 49     |
| P-value                                                        |                                    |              |             | <.0001 |                     |              |             | <.0001 |             |              |             | <.0001 |
| At the same location: Endodontist                              |                                    |              |             |        |                     |              |             |        |             |              |             |        |
| Yes                                                            | 6 (5.5)                            | 5 (4.6)      | 98 (89.9)   | 109    | 7 (6.3)             | 50 (45.0)    | 54 (48.6)   | 111    | 13 (11.7)   | 33 (29.7)    | 65 (58.6)   | 111    |
| No                                                             | 43 (1.9)                           | 36 (1.6)     | 2135 (96.4) | 2214   | 102 (4.6)           | 785 (35.4)   | 1330 (60.0) | 2217   | 106 (4.8)   | 693 (31.4)   | 1408 (63.8) | 2207   |
| Missing/Blank                                                  | 0                                  | 0            | 0           | 44     | 0                   | 0            | 0           | 39     | 0           | 0            | 0           | 49     |
| P-value                                                        |                                    |              |             | 0.003  |                     |              |             | 0.053  |             |              |             | 0.014  |
| At the same location: Oral & Maxillofacial Surgeon             |                                    |              |             |        |                     |              |             |        |             |              |             |        |
| Yes                                                            | 7 (7.8)                            | 6 (6.7)      | 77 (85.6)   | 90     | 11 (12.1)           | 36 (39.6)    | 44 (48.4)   | 91     | 14 (15.4)   | 27 (29.7)    | 50 (54.9)   | 91     |
| No                                                             | 42 (1.9)                           | 35 (1.6)     | 2156 (96.6) | 2233   | 98 (4.4)            | 799 (35.7)   | 1340 (59.9) | 2237   | 105 (4.7)   | 699 (31.4)   | 1423 (63.9) | 2227   |
| Missing/Blank                                                  | 0                                  | 0            | 0           | 44     | 0                   | 0            | 0           | 39     | 0           | 0            | 0           | 49     |
| P-value                                                        |                                    |              |             | <.0001 |                     |              |             | 0.004  |             |              |             | 0.0004 |
| At the same location: Orthodontist                             |                                    |              |             |        |                     |              |             |        |             |              |             |        |
| Yes                                                            | 8 (6.6)                            | 5 (4.1)      | 109 (89.3)  | 122    | 10 (8.1)            | 51 (41.1)    | 63 (50.8)   | 124    | 10 (8.1)    | 38 (30.6)    | 76 (61.3)   | 124    |
| No                                                             | 41 (1.9)                           | 36 (1.6)     | 2124 (96.5) | 2201   | 99 (4.5)            | 784 (35.6)   | 1321 (59.9) | 2204   | 109 (5.0)   | 688 (31.4)   | 1397 (63.7) | 2194   |
| Missing/Blank                                                  | 0                                  | 0            | 0           | 44     | 0                   | 0            | 0           | 39     | 0           | 0            | 0           | 49     |
| P-value                                                        |                                    |              |             | 0.001  |                     |              |             | 0.055  |             |              |             | 0.307  |
| At the same location: Pediatric dentist                        |                                    |              |             |        |                     |              |             |        |             |              |             |        |
| Yes                                                            | 5 (5.0)                            | 3 (3.0)      | 92 (92.0)   | 100    | 14 (13.9)           | 45 (44.6)    | 42 (41.6)   | 101    | 10 (10.0)   | 32 (32.0)    | 58 (58.0)   | 100    |
| No                                                             | 44 (2.0)                           | 38 (1.7)     | 2141 (96.3) | 2223   | 95 (4.3)            | 790 (35.5)   | 1342 (60.3) | 2227   | 109 (4.9)   | 694 (31.3)   | 1415 (63.8) | 2218   |
| Missing/Blank                                                  | 0                                  | 0            | 0           | 44     | 0                   | 0            | 0           | 39     | 0           | 0            | 0           | 49     |
| P-value                                                        |                                    |              |             | 0.052  |                     |              |             | <.0001 |             |              |             | 0.081  |
| At the same location: Periodontist                             |                                    |              |             |        |                     |              |             |        |             |              |             |        |
| Yes                                                            | 5 (3.5)                            | 6 (4.3)      | 130 (92.2)  | 141    | 11 (7.7)            | 58 (40.8)    | 73 (51.4)   | 142    | 13 (9.1)    | 51 (35.7)    | 79 (55.2)   | 143    |
| No                                                             | 44 (2.0)                           | 35 (1.6)     | 2103 (96.4) | 2182   | 98 (4.5)            | 777 (35.5)   | 1311 (60.0) | 2186   | 106 (4.9)   | 675 (31.0)   | 1394 (64.1) | 2175   |
| Missing/Blank                                                  | 0                                  | 0            | 0           | 44     | 0                   | 0            | 0           | 39     | 0           | 0            | 0           | 49     |

| Characteristic of the dentist, practice, or patient population         | Non-implant restorative procedures |              |              |        | Esthetic procedures |              |              |        | Extractions  |              |              |        |
|------------------------------------------------------------------------|------------------------------------|--------------|--------------|--------|---------------------|--------------|--------------|--------|--------------|--------------|--------------|--------|
|                                                                        | None                               | Occasionally | Routinely    | Total  | None                | Occasionally | Routinely    | Total  | None         | Occasionally | Routinely    | Total  |
| P-value                                                                |                                    |              |              | 0.023  |                     |              |              | 0.062  |              |              |              | 0.029  |
| At the same location: Prosthodontist                                   |                                    |              |              |        |                     |              |              |        |              |              |              |        |
| Yes                                                                    | 6 ( 8.6)                           | 3 ( 4.3)     | 61 (87.1)    | 70     | 8 (11.4)            | 32 (45.7)    | 30 (42.9)    | 70     | 11 (15.7)    | 21 (30.0)    | 38 (54.3)    | 70     |
| No                                                                     | 43 ( 1.9)                          | 38 ( 1.7)    | 2172 (96.4)  | 2253   | 101 ( 4.5)          | 803 (35.6)   | 1354 (60.0)  | 2258   | 108 ( 4.8)   | 705 (31.4)   | 1435 (63.8)  | 2248   |
| Missing/Blank                                                          | 0                                  | 0            | 0            | 44     | 0                   | 0            | 0            | 39     | 0            | 0            | 0            | 49     |
| P-value                                                                |                                    |              |              | 0.001  |                     |              |              | 0.003  |              |              |              | 0.002  |
| At the same location: Other                                            |                                    |              |              |        |                     |              |              |        |              |              |              |        |
| Yes                                                                    | 13 (24.1)                          | 2 ( 3.7)     | 39 (72.2)    | 54     | 18 (33.3)           | 12 (22.2)    | 24 (44.4)    | 54     | 14 (27.5)    | 6 (11.8)     | 31 (60.8)    | 51     |
| No                                                                     | 36 ( 1.6)                          | 39 ( 1.7)    | 2194 (96.7)  | 2269   | 91 ( 4.0)           | 823 (36.2)   | 1360 (59.8)  | 2274   | 105 ( 4.6)   | 720 (31.8)   | 1442 (63.6)  | 2267   |
| Missing/Blank                                                          | 0                                  | 0            | 0            | 44     | 0                   | 0            | 0            | 39     | 0            | 0            | 0            | 49     |
| P-value                                                                |                                    |              |              | <.0001 |                     |              |              | <.0001 |              |              |              | <.0001 |
| How long a patient has to wait: for a new patient exam appt in days    |                                    |              |              |        |                     |              |              |        |              |              |              |        |
| Mean (S.D.)                                                            | 10.8 ( 13.3)                       | 12.7 ( 29.1) | 7.1 ( 11.5)  |        | 12.4 ( 16.7)        | 8.3 ( 11.9)  | 6.3 ( 11.6)  |        | 8.0 ( 9.3)   | 6.5 ( 10.9)  | 7.6 ( 12.8)  |        |
| P-value                                                                |                                    |              |              | 0.002  |                     |              |              | <.0001 |              |              |              | 0.107  |
| How long a patient has to wait: for a treatment procedure appt in days |                                    |              |              |        |                     |              |              |        |              |              |              |        |
| Mean (S.D.)                                                            | 11.0 ( 14.1)                       | 8.9 ( 10.6)  | 7.0 ( 11.6)  |        | 10.4 ( 12.1)        | 8.3 ( 10.3)  | 6.2 ( 12.4)  |        | 7.9 ( 8.5)   | 6.2 ( 8.7)   | 7.6 ( 13.2)  |        |
| P-value                                                                |                                    |              |              | 0.071  |                     |              |              | <.0001 |              |              |              | 0.018  |
| How long a patient has to wait: in the waiting room in mins            |                                    |              |              |        |                     |              |              |        |              |              |              |        |
| Mean (S.D.)                                                            | 16.8 ( 19.0)                       | 11.1 ( 8.7)  | 8.2 ( 7.5)   |        | 14.6 ( 15.3)        | 8.4 ( 7.1)   | 8.0 ( 7.5)   |        | 9.8 ( 13.4)  | 6.7 ( 5.3)   | 9.2 ( 8.4)   |        |
| P-value                                                                |                                    |              |              | <.0001 |                     |              |              | <.0001 |              |              |              | <.0001 |
| Percentage of patients who are: 1-18 years old                         |                                    |              |              |        |                     |              |              |        |              |              |              |        |
| Mean (S.D.)                                                            | 22.0 ( 27.4)                       | 15.7 ( 21.6) | 17.6 ( 15.1) |        | 25.7 ( 31.3)        | 19.1 ( 17.5) | 16.3 ( 11.8) |        | 15.5 ( 17.9) | 16.7 ( 16.2) | 18.3 ( 14.9) |        |
| P-value                                                                |                                    |              |              | 0.125  |                     |              |              | <.0001 |              |              |              | 0.018  |

| Characteristic of the dentist, practice, or patient population      | Non-implant restorative procedures |              |              |        | Esthetic procedures |              |              |        | Extractions  |              |              |        |
|---------------------------------------------------------------------|------------------------------------|--------------|--------------|--------|---------------------|--------------|--------------|--------|--------------|--------------|--------------|--------|
|                                                                     | None                               | Occasionally | Routinely    | Total  | None                | Occasionally | Routinely    | Total  | None         | Occasionally | Routinely    | Total  |
| Percentage of patients who are: 19-44 years old                     |                                    |              |              |        |                     |              |              |        |              |              |              |        |
| Mean (S.D.)                                                         | 31.9 ( 19.6)                       | 26.9 ( 17.5) | 28.9 ( 12.2) |        | 27.8 ( 18.2)        | 28.3 ( 12.3) | 29.4 ( 12.0) |        | 29.4 ( 13.8) | 28.4 ( 12.7) | 29.1 ( 12.2) |        |
| P-value                                                             |                                    |              |              | 0.151  |                     |              |              | 0.093  |              |              |              | 0.396  |
| Percentage of patients who are: 45-64 years old                     |                                    |              |              |        |                     |              |              |        |              |              |              |        |
| Mean (S.D.)                                                         | 29.7 ( 17.0)                       | 34.0 ( 17.9) | 33.4 ( 11.9) |        | 28.9 ( 17.6)        | 32.6 ( 12.1) | 34.1 ( 11.5) |        | 34.0 ( 13.2) | 34.8 ( 12.6) | 32.6 ( 11.7) |        |
| P-value                                                             |                                    |              |              | 0.114  |                     |              |              | <.0001 |              |              |              | 0.0003 |
| Percentage of patients who are: 65 or older                         |                                    |              |              |        |                     |              |              |        |              |              |              |        |
| Mean (S.D.)                                                         | 16.4 ( 16.8)                       | 23.4 ( 19.4) | 20.1 ( 11.3) |        | 17.5 ( 19.1)        | 20.1 ( 11.9) | 20.2 ( 10.6) |        | 21.1 ( 13.8) | 20.1 ( 11.1) | 19.9 ( 11.5) |        |
| P-value                                                             |                                    |              |              | 0.020  |                     |              |              | 0.066  |              |              |              | 0.569  |
| Percentage of patients who are of Hispanic/Latino ethnicity         |                                    |              |              |        |                     |              |              |        |              |              |              |        |
| Mean (S.D.)                                                         | 29.5 ( 28.7)                       | 16.2 ( 18.6) | 15.0 ( 18.9) |        | 26.0 ( 26.2)        | 16.2 ( 20.3) | 14.0 ( 17.7) |        | 15.1 ( 19.1) | 13.2 ( 17.1) | 16.3 ( 20.1) |        |
| P-value                                                             |                                    |              |              | <.0001 |                     |              |              | <.0001 |              |              |              | 0.003  |
| Percentage of patients whose race is: White/Caucasian               |                                    |              |              |        |                     |              |              |        |              |              |              |        |
| Mean (S.D.)                                                         | 62.0 ( 23.2)                       | 66.0 ( 24.7) | 68.9 ( 23.3) |        | 57.6 ( 28.2)        | 67.9 ( 24.7) | 69.9 ( 21.9) |        | 74.1 ( 19.0) | 73.2 ( 20.6) | 66.1 ( 24.4) |        |
| P-value                                                             |                                    |              |              | 0.114  |                     |              |              | <.0001 |              |              |              | <.0001 |
| Percentage of patients whose race is: Black/African-American        |                                    |              |              |        |                     |              |              |        |              |              |              |        |
| Mean (S.D.)                                                         | 19.1 ( 16.5)                       | 20.9 ( 21.5) | 16.7 ( 17.0) |        | 21.5 ( 21.5)        | 16.1 ( 17.3) | 16.9 ( 16.5) |        | 13.0 ( 12.6) | 14.2 ( 14.3) | 18.3 ( 18.2) |        |
| P-value                                                             |                                    |              |              | 0.198  |                     |              |              | 0.011  |              |              |              | <.0001 |
| Percentage of patients whose race is: American Indian/Alaska Native |                                    |              |              |        |                     |              |              |        |              |              |              |        |
| Mean (S.D.)                                                         | 2.3 ( 4.4)                         | 1.0 ( 1.7)   | 1.7 ( 7.1)   |        | 3.8 ( 14.3)         | 1.7 ( 7.2)   | 1.5 ( 6.0)   |        | 1.1 ( 2.5)   | 1.2 ( 5.5)   | 1.9 ( 7.9)   |        |
| P-value                                                             |                                    |              |              | 0.706  |                     |              |              | 0.006  |              |              |              | 0.080  |

| Characteristic of the dentist, practice, or patient population                                   | Non-implant restorative procedures |              |              |        | Esthetic procedures |              |              |        | Extractions  |              |              |        |
|--------------------------------------------------------------------------------------------------|------------------------------------|--------------|--------------|--------|---------------------|--------------|--------------|--------|--------------|--------------|--------------|--------|
|                                                                                                  | None                               | Occasionally | Routinely    | Total  | None                | Occasionally | Routinely    | Total  | None         | Occasionally | Routinely    | Total  |
| Percentage of patients whose race is: Asian                                                      |                                    |              |              |        |                     |              |              |        |              |              |              |        |
| Mean (S.D.)                                                                                      | 6.3 ( 6.0)                         | 6.2 ( 7.6)   | 6.3 ( 7.6)   |        | 5.3 ( 6.0)          | 6.5 ( 7.8)   | 6.3 ( 7.6)   |        | 6.1 ( 5.9)   | 6.6 ( 7.0)   | 6.2 ( 8.0)   |        |
| P-value                                                                                          |                                    |              |              | 0.993  |                     |              |              | 0.324  |              |              |              | 0.505  |
| Percentage of patients whose race is: Native Hawaiian/Pacific Islander                           |                                    |              |              |        |                     |              |              |        |              |              |              |        |
| Mean (S.D.)                                                                                      | 1.0 ( 2.7)                         | 0.7 ( 1.9)   | 0.8 ( 2.3)   |        | 0.6 ( 1.7)          | 0.8 ( 2.6)   | 0.8 ( 2.2)   |        | 1.1 ( 2.8)   | 0.7 ( 2.1)   | 0.8 ( 2.4)   |        |
| P-value                                                                                          |                                    |              |              | 0.796  |                     |              |              | 0.672  |              |              |              | 0.284  |
| Percentage of patients whose race is: Other                                                      |                                    |              |              |        |                     |              |              |        |              |              |              |        |
| Mean (S.D.)                                                                                      | 9.3 ( 21.5)                        | 5.2 ( 15.2)  | 5.7 ( 14.7)  |        | 11.3 ( 23.8)        | 6.9 ( 16.8)  | 4.6 ( 12.6)  |        | 4.6 ( 13.8)  | 4.1 ( 11.7)  | 6.7 ( 16.3)  |        |
| P-value                                                                                          |                                    |              |              | 0.263  |                     |              |              | <.0001 |              |              |              | 0.001  |
| Percentage of patients: Covered by a private insurance program                                   |                                    |              |              |        |                     |              |              |        |              |              |              |        |
| Mean (S.D.)                                                                                      | 37.2 ( 30.6)                       | 40.4 ( 31.1) | 59.6 ( 24.6) |        | 29.0 ( 32.2)        | 58.2 ( 27.4) | 61.4 ( 21.4) |        | 59.5 ( 25.0) | 62.7 ( 22.6) | 56.9 ( 26.1) |        |
| P-value                                                                                          |                                    |              |              | <.0001 |                     |              |              | <.0001 |              |              |              | <.0001 |
| Percentage of patients: Covered by a public program                                              |                                    |              |              |        |                     |              |              |        |              |              |              |        |
| Mean (S.D.)                                                                                      | 25.6 ( 29.3)                       | 31.3 ( 33.7) | 13.6 ( 23.2) |        | 38.8 ( 37.7)        | 17.4 ( 26.2) | 10.5 ( 19.0) |        | 10.8 ( 20.8) | 10.0 ( 21.7) | 16.5 ( 24.6) |        |
| P-value                                                                                          |                                    |              |              | <.0001 |                     |              |              | <.0001 |              |              |              | <.0001 |
| Percentage of patients: Not covered by any third party and pays out of pocket                    |                                    |              |              |        |                     |              |              |        |              |              |              |        |
| Mean (S.D.)                                                                                      | 30.0 ( 32.4)                       | 21.7 ( 22.4) | 23.0 ( 17.0) |        | 19.2 ( 27.1)        | 20.4 ( 16.8) | 25.0 ( 16.8) |        | 26.5 ( 21.1) | 24.5 ( 16.9) | 22.1 ( 17.4) |        |
| P-value                                                                                          |                                    |              |              | 0.027  |                     |              |              | <.0001 |              |              |              | 0.001  |
| Percent of patients: Receiving free care or substantially reduced fees courtesy of this practice |                                    |              |              |        |                     |              |              |        |              |              |              |        |
| Mean (S.D.)                                                                                      | 5.0 ( 17.9)                        | 6.7 ( 13.1)  | 3.7 ( 10.2)  |        | 12.1 ( 23.7)        | 4.0 ( 10.9)  | 3.1 ( 8.0)   |        | 3.2 ( 11.5)  | 2.7 ( 7.0)   | 4.4 ( 11.7)  |        |
| P-value                                                                                          |                                    |              |              | 0.150  |                     |              |              | <.0001 |              |              |              | 0.002  |



| Characteristic of the dentist, practice, or patient population                                  | Non-implant restorative procedures |              |              |        | Esthetic procedures |              |              |        | Extractions  |              |              |        |
|-------------------------------------------------------------------------------------------------|------------------------------------|--------------|--------------|--------|---------------------|--------------|--------------|--------|--------------|--------------|--------------|--------|
|                                                                                                 | None                               | Occasionally | Routinely    | Total  | None                | Occasionally | Routinely    | Total  | None         | Occasionally | Routinely    | Total  |
| Percent of patients who come: For one visit only                                                |                                    |              |              |        |                     |              |              |        |              |              |              |        |
| Mean (S.D.)                                                                                     | 28.4 ( 29.7)                       | 13.6 ( 11.9) | 8.1 ( 8.6)   |        | 20.8 ( 24.1)        | 8.5 ( 9.1)   | 7.8 ( 7.8)   |        | 11.5 ( 17.2) | 6.6 ( 7.0)   | 9.3 ( 10.1)  |        |
| P-value                                                                                         |                                    |              |              | <.0001 |                     |              |              | <.0001 |              |              |              | <.0001 |
| Percent of patients who come: Occasionally only when they have an emergency or specific problem |                                    |              |              |        |                     |              |              |        |              |              |              |        |
| Mean (S.D.)                                                                                     | 15.2 ( 14.5)                       | 18.5 ( 13.3) | 12.9 ( 9.3)  |        | 17.3 ( 15.1)        | 13.8 ( 9.9)  | 12.3 ( 8.7)  |        | 11.2 ( 9.3)  | 10.4 ( 7.4)  | 14.6 ( 10.5) |        |
| P-value                                                                                         |                                    |              |              | 0.0004 |                     |              |              | <.0001 |              |              |              | <.0001 |
| Percent of patients who come: Irregularly whether or not they have a problem                    |                                    |              |              |        |                     |              |              |        |              |              |              |        |
| Mean (S.D.)                                                                                     | 16.2 ( 16.7)                       | 17.8 ( 19.8) | 16.1 ( 10.1) |        | 18.2 ( 16.4)        | 16.9 ( 10.6) | 15.6 ( 9.7)  |        | 14.8 ( 12.4) | 15.1 ( 10.0) | 16.8 ( 10.5) |        |
| P-value                                                                                         |                                    |              |              | 0.610  |                     |              |              | 0.003  |              |              |              | 0.001  |
| Percent of patients who come: Regularly as recommended or whether or not they have a problem    |                                    |              |              |        |                     |              |              |        |              |              |              |        |
| Mean (S.D.)                                                                                     | 40.3 ( 30.9)                       | 50.1 ( 27.1) | 62.9 ( 18.9) |        | 43.8 ( 27.8)        | 60.8 ( 19.9) | 64.3 ( 17.9) |        | 62.4 ( 23.8) | 67.8 ( 17.0) | 59.3 ( 19.9) |        |
| P-value                                                                                         |                                    |              |              | <.0001 |                     |              |              | <.0001 |              |              |              | <.0001 |

<sup>a</sup> This table is limited to the 2,367 GDs who reported their generalist/specialist status. This includes enrollments as of October 31, 2013.

<sup>b</sup> P-values for the association between the characteristic and the procedure computed using Fisher's exact test (for categorical variables) and analysis of variance (for numerical variables).

GD: general dentist  
AEGD: Advanced Education in General Dentistry  
GPR: General Practice Residency  
FAGD: Fellow of the Academy of General Dentistry  
MAGD: Master of the Academy of General Dentistry

Frequency of provision of two of the five 'very common' procedure types, by dentist, practice, and patient characteristics <sup>a,b</sup>

| Characteristic of the dentist, practice, or patient population | Removable prosthetics |              |              |        | Endodontic therapy – anteriors/premolars |              |              |        |
|----------------------------------------------------------------|-----------------------|--------------|--------------|--------|------------------------------------------|--------------|--------------|--------|
|                                                                | None                  | Occasionally | Routinely    | Total  | None                                     | Occasionally | Routinely    | Total  |
| Dentist gender                                                 |                       |              |              |        |                                          |              |              |        |
| Male                                                           | 82 ( 4.8)             | 591 (34.9)   | 1022 (60.3)  | 1695   | 237 (14.0)                               | 392 (23.2)   | 1063 (62.8)  | 1692   |
| Female                                                         | 48 ( 7.8)             | 277 (45.0)   | 291 (47.2)   | 616    | 138 (22.4)                               | 210 (34.0)   | 269 (43.6)   | 617    |
| Missing/Blank                                                  | 0                     | 8            | 3            | 56     | 1                                        | 3            | 7            | 58     |
| P-value                                                        |                       |              |              | <.0001 |                                          |              |              | <.0001 |
| Dentist age in years                                           |                       |              |              |        |                                          |              |              |        |
| Mean (S.D.)                                                    | 48.9 ( 13.9)          | 48.8 ( 11.9) | 52.9 ( 11.7) |        | 53.7 ( 12.3)                             | 49.4 ( 12.6) | 51.1 ( 11.6) |        |
| P-value                                                        |                       |              |              | <.0001 |                                          |              |              | <.0001 |
| Dentist Hispanic/Latino ethnicity                              |                       |              |              |        |                                          |              |              |        |
| Yes                                                            | 8 ( 6.8)              | 36 (30.5)    | 74 (62.7)    | 118    | 13 (11.1)                                | 33 (28.2)    | 71 (60.7)    | 117    |
| No                                                             | 121 ( 5.6)            | 826 (37.9)   | 1230 (56.5)  | 2177   | 359 (16.5)                               | 563 (25.9)   | 1254 (57.6)  | 2176   |
| Missing/Blank                                                  | 1                     | 14           | 12           | 72     | 4                                        | 9            | 14           | 74     |
| P-value                                                        |                       |              |              | 0.231  |                                          |              |              | 0.306  |
| Dentist race                                                   |                       |              |              |        |                                          |              |              |        |
| White/Caucasian                                                | 108 ( 5.6)            | 726 (37.5)   | 1101 (56.9)  | 1935   | 329 (17.0)                               | 496 (25.7)   | 1106 (57.3)  | 1931   |
| Black/African-American                                         | 5 ( 4.5)              | 27 (24.1)    | 80 (71.4)    | 112    | 16 (14.3)                                | 31 (27.7)    | 65 (58.0)    | 112    |
| American Indian/Alaska Native                                  | 1 (16.7)              | 3 (50.0)     | 2 (33.3)     | 6      | 1 (16.7)                                 | 3 (50.0)     | 2 (33.3)     | 6      |
| Asian                                                          | 10 ( 5.8)             | 77 (44.5)    | 86 (49.7)    | 173    | 15 ( 8.6)                                | 45 (25.9)    | 114 (65.5)   | 174    |
| Native Hawaiian/Pacific Islander                               | 1 (50.0)              | 0 ( 0.0)     | 1 (50.0)     | 2      | 1 (50.0)                                 | 0 ( 0.0)     | 1 (50.0)     | 2      |
| Other                                                          | 3 ( 4.5)              | 25 (37.9)    | 38 (57.6)    | 66     | 10 (14.9)                                | 20 (29.9)    | 37 (55.2)    | 67     |
| Missing/Blank                                                  | 2                     | 18           | 8            | 73     | 4                                        | 10           | 14           | 75     |
| P-value                                                        |                       |              |              | 0.010  |                                          |              |              | 0.101  |
| Year of graduation from dental school                          |                       |              |              |        |                                          |              |              |        |
| Mean (S.D.)                                                    | 1991 ( 13.7)          | 1992 ( 12.3) | 1988 ( 12.3) |        | 1986 ( 12.6)                             | 1991 ( 13.0) | 1989 ( 12.1) |        |
| P-value                                                        |                       |              |              | <.0001 |                                          |              |              | <.0001 |

| Characteristic of the dentist, practice, or patient population | Removable prosthetics |              |             |       | Endodontic therapy – anteriors/premolars |              |             |       |
|----------------------------------------------------------------|-----------------------|--------------|-------------|-------|------------------------------------------|--------------|-------------|-------|
|                                                                | None                  | Occasionally | Routinely   | Total | None                                     | Occasionally | Routinely   | Total |
| After dental school: No formal training program                |                       |              |             |       |                                          |              |             |       |
| Yes                                                            | 53 ( 5.2)             | 394 (38.8)   | 568 (56.0)  | 1015  | 174 (17.1)                               | 281 (27.7)   | 561 (55.2)  | 1016  |
| No                                                             | 77 ( 5.9)             | 482 (36.9)   | 748 (57.2)  | 1307  | 202 (15.5)                               | 324 (24.8)   | 778 (59.7)  | 1304  |
| Missing/Blank                                                  | 0                     | 0            | 0           | 45    | 0                                        | 0            | 0           | 47    |
| P-value                                                        |                       |              |             | 0.558 |                                          |              |             | 0.098 |
| After dental school: Completed an AEGD program                 |                       |              |             |       |                                          |              |             |       |
| Yes                                                            | 14 ( 6.3)             | 82 (36.9)    | 126 (56.8)  | 222   | 36 (16.2)                                | 64 (28.8)    | 122 (55.0)  | 222   |
| No                                                             | 116 ( 5.5)            | 794 (37.8)   | 1190 (56.7) | 2100  | 340 (16.2)                               | 541 (25.8)   | 1217 (58.0) | 2098  |
| Missing/Blank                                                  | 0                     | 0            | 0           | 45    | 0                                        | 0            | 0           | 47    |
| P-value                                                        |                       |              |             | 0.843 |                                          |              |             | 0.576 |
| After dental school: Completed a GPR program                   |                       |              |             |       |                                          |              |             |       |
| Yes                                                            | 25 ( 4.9)             | 203 (39.4)   | 287 (55.7)  | 515   | 71 (13.9)                                | 131 (25.6)   | 310 (60.5)  | 512   |
| No                                                             | 105 ( 5.8)            | 673 (37.2)   | 1029 (56.9) | 1807  | 305 (16.9)                               | 474 (26.2)   | 1029 (56.9) | 1808  |
| Missing/Blank                                                  | 0                     | 0            | 0           | 45    | 0                                        | 0            | 0           | 47    |
| P-value                                                        |                       |              |             | 0.549 |                                          |              |             | 0.202 |
| After dental school: I am a FAGD                               |                       |              |             |       |                                          |              |             |       |
| Yes                                                            | 11 ( 3.4)             | 134 (41.5)   | 178 (55.1)  | 323   | 46 (14.2)                                | 69 (21.4)    | 208 (64.4)  | 323   |
| No                                                             | 119 ( 6.0)            | 742 (37.1)   | 1138 (56.9) | 1999  | 330 (16.5)                               | 536 (26.8)   | 1131 (56.6) | 1997  |
| Missing/Blank                                                  | 0                     | 0            | 0           | 45    | 0                                        | 0            | 0           | 47    |
| P-value                                                        |                       |              |             | 0.087 |                                          |              |             | 0.032 |
| After dental school: Completed MAGD                            |                       |              |             |       |                                          |              |             |       |
| Yes                                                            | 5 ( 3.8)              | 45 (34.4)    | 81 (61.8)   | 131   | 13 ( 9.9)                                | 29 (22.1)    | 89 (67.9)   | 131   |
| No                                                             | 125 ( 5.7)            | 831 (37.9)   | 1235 (56.4) | 2191  | 363 (16.6)                               | 576 (26.3)   | 1250 (57.1) | 2189  |
| Missing/Blank                                                  | 0                     | 0            | 0           | 45    | 0                                        | 0            | 0           | 47    |
| P-value                                                        |                       |              |             | 0.440 |                                          |              |             | 0.036 |

| Characteristic of the dentist, practice, or patient population | Removable prosthetics |              |             |        | Endodontic therapy – anteriors/premolars |              |             |        |
|----------------------------------------------------------------|-----------------------|--------------|-------------|--------|------------------------------------------|--------------|-------------|--------|
|                                                                | None                  | Occasionally | Routinely   | Total  | None                                     | Occasionally | Routinely   | Total  |
| After dental school: Completed some other training program     |                       |              |             |        |                                          |              |             |        |
| Yes                                                            | 46 ( 9.1)             | 160 (31.6)   | 301 (59.4)  | 507    | 96 (18.9)                                | 109 (21.5)   | 303 (59.6)  | 508    |
| No                                                             | 84 ( 4.6)             | 716 (39.4)   | 1015 (55.9) | 1815   | 280 (15.5)                               | 496 (27.4)   | 1036 (57.2) | 1812   |
| Missing/Blank                                                  | 0                     | 0            | 0           | 45     | 0                                        | 0            | 0           | 47     |
| P-value                                                        |                       |              |             | <.0001 |                                          |              |             | 0.013  |
| Member of: American Dental Association                         |                       |              |             |        |                                          |              |             |        |
| Yes                                                            | 87 ( 4.8)             | 691 (37.8)   | 1048 (57.4) | 1826   | 296 (16.2)                               | 466 (25.5)   | 1063 (58.2) | 1825   |
| No                                                             | 43 ( 8.7)             | 185 (37.3)   | 268 (54.0)  | 496    | 80 (16.2)                                | 139 (28.1)   | 276 (55.8)  | 495    |
| Missing/Blank                                                  | 0                     | 0            | 0           | 45     | 0                                        | 0            | 0           | 47     |
| P-value                                                        |                       |              |             | 0.005  |                                          |              |             | 0.499  |
| Member of: Academy of General Dentistry                        |                       |              |             |        |                                          |              |             |        |
| Yes                                                            | 37 ( 4.2)             | 354 (40.2)   | 490 (55.6)  | 881    | 132 (15.0)                               | 225 (25.6)   | 522 (59.4)  | 879    |
| No                                                             | 93 ( 6.5)             | 522 (36.2)   | 826 (57.3)  | 1441   | 244 (16.9)                               | 380 (26.4)   | 817 (56.7)  | 1441   |
| Missing/Blank                                                  | 0                     | 0            | 0           | 45     | 0                                        | 0            | 0           | 47     |
| P-value                                                        |                       |              |             | 0.023  |                                          |              |             | 0.362  |
| Hours in practice in patient contact                           |                       |              |             |        |                                          |              |             |        |
| 32 or more hours                                               | 72 ( 3.7)             | 709 (36.8)   | 1147 (59.5) | 1928   | 256 (13.3)                               | 477 (24.8)   | 1193 (61.9) | 1926   |
| Less than 32 hours                                             | 54 (14.4)             | 162 (43.2)   | 159 (42.4)  | 375    | 116 (30.9)                               | 123 (32.8)   | 136 (36.3)  | 375    |
| Missing/Blank                                                  | 4                     | 5            | 10          | 64     | 4                                        | 5            | 10          | 66     |
| P-value                                                        |                       |              |             | <.0001 |                                          |              |             | <.0001 |
| Number of different locations at which you see patients        |                       |              |             |        |                                          |              |             |        |
| 1 location                                                     | 100 ( 5.1)            | 760 (38.5)   | 1112 (56.4) | 1972   | 322 (16.4)                               | 515 (26.2)   | 1132 (57.5) | 1969   |
| 2 locations                                                    | 18 ( 6.5)             | 95 (34.3)    | 164 (59.2)  | 277    | 38 (13.7)                                | 67 (24.1)    | 173 (62.2)  | 278    |
| 3 locations                                                    | 5 (11.6)              | 9 (20.9)     | 29 (67.4)   | 43     | 6 (14.0)                                 | 14 (32.6)    | 23 (53.5)   | 43     |
| More than 3                                                    | 7 (23.3)              | 12 (40.0)    | 11 (36.7)   | 30     | 10 (33.3)                                | 9 (30.0)     | 11 (36.7)   | 30     |
| Missing/Blank                                                  | 0                     | 0            | 0           | 45     | 0                                        | 0            | 0           | 47     |
| P-value                                                        |                       |              |             | 0.001  |                                          |              |             | 0.094  |

| Characteristic of the dentist, practice, or patient population                                          | Removable prosthetics |              |             |        | Endodontic therapy – anteriors/premolars |              |             |        |
|---------------------------------------------------------------------------------------------------------|-----------------------|--------------|-------------|--------|------------------------------------------|--------------|-------------|--------|
|                                                                                                         | None                  | Occasionally | Routinely   | Total  | None                                     | Occasionally | Routinely   | Total  |
| Practice location                                                                                       |                       |              |             |        |                                          |              |             |        |
| Inner City of Urban Area                                                                                | 25 (9.1)              | 84 (30.5)    | 166 (60.4)  | 275    | 54 (19.6)                                | 71 (25.8)    | 150 (54.5)  | 275    |
| Urban (not inner city)                                                                                  | 51 (7.9)              | 254 (39.3)   | 342 (52.9)  | 647    | 131 (20.3)                               | 177 (27.4)   | 338 (52.3)  | 646    |
| Suburban                                                                                                | 29 (2.8)              | 439 (43.1)   | 551 (54.1)  | 1019   | 138 (13.6)                               | 261 (25.7)   | 618 (60.8)  | 1017   |
| Rural                                                                                                   | 25 (6.7)              | 94 (25.3)    | 252 (67.9)  | 371    | 52 (14.0)                                | 93 (25.0)    | 227 (61.0)  | 372    |
| Missing/Blank                                                                                           | 0                     | 5            | 5           | 55     | 1                                        | 3            | 6           | 57     |
| P-value                                                                                                 |                       |              |             | <.0001 |                                          |              |             | 0.002  |
| Type of main practice (full)                                                                            |                       |              |             |        |                                          |              |             |        |
| Owner of private practice                                                                               | 36 (2.2)              | 606 (36.9)   | 1000 (60.9) | 1642   | 242 (14.7)                               | 384 (23.4)   | 1015 (61.9) | 1641   |
| Associate or employee of a private practice                                                             | 23 (7.2)              | 144 (45.3)   | 151 (47.5)  | 318    | 57 (18.0)                                | 100 (31.5)   | 160 (50.5)  | 317    |
| HealthPartners Dental Group                                                                             | 3 (5.9)               | 8 (15.7)     | 40 (78.4)   | 51     | 2 (3.9)                                  | 9 (17.6)     | 40 (78.4)   | 51     |
| Permanente Dental Associates                                                                            | 4 (6.3)               | 40 (63.5)    | 19 (30.2)   | 63     | 2 (3.2)                                  | 14 (22.2)    | 47 (74.6)   | 63     |
| Other managed care or preferred provider organization                                                   | 2 (11.8)              | 7 (41.2)     | 8 (47.1)    | 17     | 1 (5.9)                                  | 5 (29.4)     | 11 (64.7)   | 17     |
| Public health practice, community health center, or publicly-funded clinic (but not a federal facility) | 32 (27.1)             | 37 (31.4)    | 49 (41.5)   | 118    | 29 (24.6)                                | 52 (44.1)    | 37 (31.4)   | 118    |
| Federal government facility (VA, DoD, Public Health Service)                                            | 8 (20.5)              | 6 (15.4)     | 25 (64.1)   | 39     | 6 (15.4)                                 | 20 (51.3)    | 13 (33.3)   | 39     |
| Dental school, academic institution, or facility staffed by dental school                               | 22 (32.8)             | 23 (34.3)    | 22 (32.8)   | 67     | 35 (52.2)                                | 18 (26.9)    | 14 (20.9)   | 67     |
| Missing/Blank                                                                                           | 0                     | 5            | 2           | 52     | 2                                        | 3            | 2           | 54     |
| P-value                                                                                                 |                       |              |             | <.0001 |                                          |              |             | <.0001 |
| Type of main practice (private)                                                                         |                       |              |             |        |                                          |              |             |        |
| Private                                                                                                 | 68 (3.3)              | 805 (38.5)   | 1218 (58.2) | 2091   | 304 (14.6)                               | 512 (24.5)   | 1273 (60.9) | 2089   |
| Non private                                                                                             | 62 (27.7)             | 66 (29.5)    | 96 (42.9)   | 224    | 70 (31.3)                                | 90 (40.2)    | 64 (28.6)   | 224    |
| Missing/Blank                                                                                           | 0                     | 5            | 2           | 52     | 2                                        | 3            | 2           | 54     |
| P-value                                                                                                 |                       |              |             | <.0001 |                                          |              |             | <.0001 |
| At the same location: Not applicable-only GDs at this location                                          |                       |              |             |        |                                          |              |             |        |
| Yes                                                                                                     | 73 (3.8)              | 726 (37.6)   | 1130 (58.6) | 1929   | 284 (14.7)                               | 508 (26.4)   | 1135 (58.9) | 1927   |

| Characteristic of the dentist, practice, or patient population | Removable prosthetics |              |             |        | Endodontic therapy – anteriors/premolars |              |             |        |
|----------------------------------------------------------------|-----------------------|--------------|-------------|--------|------------------------------------------|--------------|-------------|--------|
|                                                                | None                  | Occasionally | Routinely   | Total  | None                                     | Occasionally | Routinely   | Total  |
| No                                                             | 57 (14.5)             | 150 (38.2)   | 186 (47.3)  | 393    | 92 (23.4)                                | 97 (24.7)    | 204 (51.9)  | 393    |
| Missing/Blank                                                  | 0                     | 0            | 0           | 45     | 0                                        | 0            | 0           | 47     |
| P-value                                                        |                       |              |             | <.0001 |                                          |              |             | <.0001 |
| At the same location: Endodontist                              |                       |              |             |        |                                          |              |             |        |
| Yes                                                            | 13 (11.7)             | 47 (42.3)    | 51 (45.9)   | 111    | 34 (30.6)                                | 30 (27.0)    | 47 (42.3)   | 111    |
| No                                                             | 117 ( 5.3)            | 829 (37.5)   | 1265 (57.2) | 2211   | 342 (15.5)                               | 575 (26.0)   | 1292 (58.5) | 2209   |
| Missing/Blank                                                  | 0                     | 0            | 0           | 45     | 0                                        | 0            | 0           | 47     |
| P-value                                                        |                       |              |             | 0.007  |                                          |              |             | <.0001 |
| At the same location: Oral & Maxillofacial Surgeon             |                       |              |             |        |                                          |              |             |        |
| Yes                                                            | 15 (16.5)             | 34 (37.4)    | 42 (46.2)   | 91     | 31 (34.1)                                | 21 (23.1)    | 39 (42.9)   | 91     |
| No                                                             | 115 ( 5.2)            | 842 (37.7)   | 1274 (57.1) | 2231   | 345 (15.5)                               | 584 (26.2)   | 1300 (58.3) | 2229   |
| Missing/Blank                                                  | 0                     | 0            | 0           | 45     | 0                                        | 0            | 0           | 47     |
| P-value                                                        |                       |              |             | <.0001 |                                          |              |             | <.0001 |
| At the same location: Orthodontist                             |                       |              |             |        |                                          |              |             |        |
| Yes                                                            | 14 (11.3)             | 50 (40.3)    | 60 (48.4)   | 124    | 26 (21.0)                                | 36 (29.0)    | 62 (50.0)   | 124    |
| No                                                             | 116 ( 5.3)            | 826 (37.6)   | 1256 (57.1) | 2198   | 350 (15.9)                               | 569 (25.9)   | 1277 (58.2) | 2196   |
| Missing/Blank                                                  | 0                     | 0            | 0           | 45     | 0                                        | 0            | 0           | 47     |
| P-value                                                        |                       |              |             | 0.014  |                                          |              |             | 0.156  |
| At the same location: Pediatric dentist                        |                       |              |             |        |                                          |              |             |        |
| Yes                                                            | 21 (20.8)             | 35 (34.7)    | 45 (44.6)   | 101    | 24 (23.8)                                | 21 (20.8)    | 56 (55.4)   | 101    |
| No                                                             | 109 ( 4.9)            | 841 (37.9)   | 1271 (57.2) | 2221   | 352 (15.9)                               | 584 (26.3)   | 1283 (57.8) | 2219   |
| Missing/Blank                                                  | 0                     | 0            | 0           | 45     | 0                                        | 0            | 0           | 47     |
| P-value                                                        |                       |              |             | <.0001 |                                          |              |             | 0.092  |
| At the same location: Periodontist                             |                       |              |             |        |                                          |              |             |        |
| Yes                                                            | 17 (12.0)             | 55 (38.7)    | 70 (49.3)   | 142    | 31 (21.8)                                | 43 (30.3)    | 68 (47.9)   | 142    |
| No                                                             | 113 ( 5.2)            | 821 (37.7)   | 1246 (57.2) | 2180   | 345 (15.8)                               | 562 (25.8)   | 1271 (58.4) | 2178   |
| Missing/Blank                                                  | 0                     | 0            | 0           | 45     | 0                                        | 0            | 0           | 47     |

| Characteristic of the dentist, practice, or patient population         | Removable prosthetics |              |              |        | Endodontic therapy – anteriors/premolars |              |              |       |
|------------------------------------------------------------------------|-----------------------|--------------|--------------|--------|------------------------------------------|--------------|--------------|-------|
|                                                                        | None                  | Occasionally | Routinely    | Total  | None                                     | Occasionally | Routinely    | Total |
| P-value                                                                |                       |              |              | 0.004  |                                          |              |              | 0.037 |
| At the same location: Prosthodontist                                   |                       |              |              |        |                                          |              |              |       |
| Yes                                                                    | 14 (20.0)             | 26 (37.1)    | 30 (42.9)    | 70     | 21 (30.0)                                | 22 (31.4)    | 27 (38.6)    | 70    |
| No                                                                     | 116 ( 5.2)            | 850 (37.7)   | 1286 (57.1)  | 2252   | 355 (15.8)                               | 583 (25.9)   | 1312 (58.3)  | 2250  |
| Missing/Blank                                                          | 0                     | 0            | 0            | 45     | 0                                        | 0            | 0            | 47    |
| P-value                                                                |                       |              |              | <.0001 |                                          |              |              | 0.001 |
| At the same location: Other                                            |                       |              |              |        |                                          |              |              |       |
| Yes                                                                    | 17 (31.5)             | 13 (24.1)    | 24 (44.4)    | 54     | 19 (35.2)                                | 12 (22.2)    | 23 (42.6)    | 54    |
| No                                                                     | 113 ( 5.0)            | 863 (38.1)   | 1292 (57.0)  | 2268   | 357 (15.8)                               | 593 (26.2)   | 1316 (58.1)  | 2266  |
| Missing/Blank                                                          | 0                     | 0            | 0            | 45     | 0                                        | 0            | 0            | 47    |
| P-value                                                                |                       |              |              | <.0001 |                                          |              |              | 0.002 |
| How long a patient has to wait: for a new patient exam appt in days    |                       |              |              |        |                                          |              |              |       |
| Mean (S.D.)                                                            | 10.7 ( 12.8)          | 6.9 ( 9.3)   | 7.3 ( 13.5)  |        | 7.8 ( 13.3)                              | 7.8 ( 10.7)  | 6.9 ( 12.3)  |       |
| P-value                                                                |                       |              |              | 0.005  |                                          |              |              | 0.240 |
| How long a patient has to wait: for a treatment procedure appt in days |                       |              |              |        |                                          |              |              |       |
| Mean (S.D.)                                                            | 10.5 ( 12.2)          | 6.9 ( 9.4)   | 7.0 ( 13.0)  |        | 7.4 ( 10.4)                              | 7.7 ( 10.0)  | 6.9 ( 12.7)  |       |
| P-value                                                                |                       |              |              | 0.006  |                                          |              |              | 0.412 |
| How long a patient has to wait: in the waiting room in mins            |                       |              |              |        |                                          |              |              |       |
| Mean (S.D.)                                                            | 12.8 ( 10.9)          | 7.2 ( 5.8)   | 8.8 ( 8.7)   |        | 9.6 ( 11.5)                              | 8.1 ( 7.2)   | 8.3 ( 7.1)   |       |
| P-value                                                                |                       |              |              | <.0001 |                                          |              |              | 0.011 |
| Percentage of patients who are: 1-18 years old                         |                       |              |              |        |                                          |              |              |       |
| Mean (S.D.)                                                            | 37.6 ( 35.5)          | 18.0 ( 15.5) | 15.6 ( 10.0) |        | 20.3 ( 24.0)                             | 17.7 ( 16.9) | 17.0 ( 11.2) |       |
| P-value                                                                |                       |              |              | <.0001 |                                          |              |              | 0.001 |

| Characteristic of the dentist, practice, or patient population      | Removable prosthetics |              |              |        | Endodontic therapy – anteriors/premolars |              |              |       |
|---------------------------------------------------------------------|-----------------------|--------------|--------------|--------|------------------------------------------|--------------|--------------|-------|
|                                                                     | None                  | Occasionally | Routinely    | Total  | None                                     | Occasionally | Routinely    | Total |
| Percentage of patients who are: 19-44 years old                     |                       |              |              |        |                                          |              |              |       |
| Mean (S.D.)                                                         | 27.0 ( 20.5)          | 29.7 ( 12.8) | 28.5 ( 11.1) |        | 27.1 ( 15.0)                             | 29.4 ( 13.7) | 29.2 ( 11.0) |       |
| P-value                                                             |                       |              |              | 0.018  |                                          |              |              | 0.010 |
| Percentage of patients who are: 45-64 years old                     |                       |              |              |        |                                          |              |              |       |
| Mean (S.D.)                                                         | 24.2 ( 17.7)          | 33.4 ( 12.3) | 34.2 ( 11.0) |        | 31.3 ( 14.6)                             | 33.3 ( 13.2) | 33.9 ( 10.7) |       |
| P-value                                                             |                       |              |              | <.0001 |                                          |              |              | 0.001 |
| Percentage of patients who are: 65 or older                         |                       |              |              |        |                                          |              |              |       |
| Mean (S.D.)                                                         | 11.2 ( 10.8)          | 18.9 ( 10.4) | 21.7 ( 11.9) |        | 21.3 ( 15.9)                             | 19.7 ( 11.9) | 19.9 ( 9.9)  |       |
| P-value                                                             |                       |              |              | <.0001 |                                          |              |              | 0.080 |
| Percentage of patients who are of Hispanic/Latino ethnicity         |                       |              |              |        |                                          |              |              |       |
| Mean (S.D.)                                                         | 28.8 ( 29.4)          | 15.5 ( 18.9) | 13.8 ( 17.7) |        | 16.6 ( 20.4)                             | 15.8 ( 19.7) | 14.6 ( 18.6) |       |
| P-value                                                             |                       |              |              | <.0001 |                                          |              |              | 0.173 |
| Percentage of patients whose race is: White/Caucasian               |                       |              |              |        |                                          |              |              |       |
| Mean (S.D.)                                                         | 56.9 ( 27.6)          | 70.2 ( 22.1) | 68.8 ( 23.3) |        | 67.5 ( 23.7)                             | 67.1 ( 24.9) | 69.6 ( 22.4) |       |
| P-value                                                             |                       |              |              | <.0001 |                                          |              |              | 0.064 |
| Percentage of patients whose race is: Black/African-American        |                       |              |              |        |                                          |              |              |       |
| Mean (S.D.)                                                         | 16.6 ( 17.8)          | 14.3 ( 14.7) | 18.5 ( 18.2) |        | 17.6 ( 17.2)                             | 17.3 ( 18.3) | 16.4 ( 16.5) |       |
| P-value                                                             |                       |              |              | <.0001 |                                          |              |              | 0.406 |
| Percentage of patients whose race is: American Indian/Alaska Native |                       |              |              |        |                                          |              |              |       |
| Mean (S.D.)                                                         | 3.8 ( 13.3)           | 1.7 ( 7.0)   | 1.4 ( 6.1)   |        | 1.3 ( 3.3)                               | 2.0 ( 8.7)   | 1.6 ( 6.9)   |       |
| P-value                                                             |                       |              |              | 0.001  |                                          |              |              | 0.364 |



| Characteristic of the dentist, practice, or patient population                                   | Removable prosthetics |              |              |        | Endodontic therapy – anteriors/premolars |              |              |        |
|--------------------------------------------------------------------------------------------------|-----------------------|--------------|--------------|--------|------------------------------------------|--------------|--------------|--------|
|                                                                                                  | None                  | Occasionally | Routinely    | Total  | None                                     | Occasionally | Routinely    | Total  |
| Percentage of patients whose race is: Asian                                                      |                       |              |              |        |                                          |              |              |        |
| Mean (S.D.)                                                                                      | 7.1 ( 9.0)            | 7.2 ( 7.6)   | 5.7 ( 7.3)   |        | 6.2 ( 6.5)                               | 6.3 ( 7.6)   | 6.4 ( 7.9)   |        |
| P-value                                                                                          |                       |              |              | <.0001 |                                          |              |              | 0.868  |
| Percentage of patients whose race is: Native Hawaiian/Pacific Islander                           |                       |              |              |        |                                          |              |              |        |
| Mean (S.D.)                                                                                      | 1.1 ( 2.5)            | 0.9 ( 2.5)   | 0.7 ( 2.1)   |        | 0.8 ( 2.3)                               | 0.7 ( 1.9)   | 0.8 ( 2.5)   |        |
| P-value                                                                                          |                       |              |              | 0.018  |                                          |              |              | 0.569  |
| Percentage of patients whose race is: Other                                                      |                       |              |              |        |                                          |              |              |        |
| Mean (S.D.)                                                                                      | 14.5 ( 27.1)          | 5.7 ( 14.2)  | 4.9 ( 13.3)  |        | 6.5 ( 16.5)                              | 6.7 ( 16.4)  | 5.1 ( 13.7)  |        |
| P-value                                                                                          |                       |              |              | <.0001 |                                          |              |              | 0.057  |
| Percentage of patients: Covered by a private insurance program                                   |                       |              |              |        |                                          |              |              |        |
| Mean (S.D.)                                                                                      | 39.9 ( 34.5)          | 63.1 ( 24.2) | 57.8 ( 23.8) |        | 53.0 ( 28.4)                             | 56.8 ( 28.3) | 61.3 ( 22.2) |        |
| P-value                                                                                          |                       |              |              | <.0001 |                                          |              |              | <.0001 |
| Percentage of patients: Covered by a public program                                              |                       |              |              |        |                                          |              |              |        |
| Mean (S.D.)                                                                                      | 37.1 ( 35.9)          | 11.8 ( 21.5) | 13.6 ( 22.6) |        | 15.9 ( 26.9)                             | 17.9 ( 29.0) | 12.1 ( 19.6) |        |
| P-value                                                                                          |                       |              |              | <.0001 |                                          |              |              | <.0001 |
| Percentage of patients: Not covered by any third party and pays out of pocket                    |                       |              |              |        |                                          |              |              |        |
| Mean (S.D.)                                                                                      | 15.5 ( 19.9)          | 21.8 ( 17.0) | 24.6 ( 17.5) |        | 25.5 ( 21.4)                             | 21.0 ( 17.3) | 23.3 ( 16.4) |        |
| P-value                                                                                          |                       |              |              | <.0001 |                                          |              |              | 0.0004 |
| Percent of patients: Receiving free care or substantially reduced fees courtesy of this practice |                       |              |              |        |                                          |              |              |        |
| Mean (S.D.)                                                                                      | 7.5 ( 15.9)           | 3.3 ( 9.3)   | 3.9 ( 10.4)  |        | 5.4 ( 13.9)                              | 4.2 ( 11.8)  | 3.3 ( 8.5)   |        |
| P-value                                                                                          |                       |              |              | 0.0002 |                                          |              |              | 0.002  |

| Characteristic of the dentist, practice, or patient population                                  | Removable prosthetics |              |              |        | Endodontic therapy – anteriors/premolars |              |              |       |
|-------------------------------------------------------------------------------------------------|-----------------------|--------------|--------------|--------|------------------------------------------|--------------|--------------|-------|
|                                                                                                 | None                  | Occasionally | Routinely    | Total  | None                                     | Occasionally | Routinely    | Total |
| Percent of patients who come: For one visit only                                                |                       |              |              |        |                                          |              |              |       |
| Mean (S.D.)                                                                                     | 15.0 ( 18.9)          | 7.8 ( 8.4)   | 8.6 ( 9.5)   |        | 10.0 ( 15.4)                             | 8.8 ( 9.6)   | 8.1 ( 7.7)   |       |
| P-value                                                                                         |                       |              |              | <.0001 |                                          |              |              | 0.006 |
| Percent of patients who come: Occasionally only when they have an emergency or specific problem |                       |              |              |        |                                          |              |              |       |
| Mean (S.D.)                                                                                     | 15.5 ( 13.5)          | 12.0 ( 8.7)  | 13.5 ( 9.6)  |        | 12.8 ( 11.6)                             | 12.7 ( 9.5)  | 13.3 ( 9.0)  |       |
| P-value                                                                                         |                       |              |              | <.0001 |                                          |              |              | 0.362 |
| Percent of patients who come: Irregularly whether or not they have a problem                    |                       |              |              |        |                                          |              |              |       |
| Mean (S.D.)                                                                                     | 17.3 ( 13.9)          | 15.7 ( 9.8)  | 16.3 ( 10.5) |        | 15.3 ( 12.2)                             | 16.2 ( 10.0) | 16.4 ( 10.2) |       |
| P-value                                                                                         |                       |              |              | 0.192  |                                          |              |              | 0.164 |
| Percent of patients who come: Regularly as recommended or whether or not they have a problem    |                       |              |              |        |                                          |              |              |       |
| Mean (S.D.)                                                                                     | 52.2 ( 26.8)          | 64.5 ( 18.1) | 61.6 ( 19.5) |        | 61.9 ( 24.1)                             | 62.4 ( 19.7) | 62.1 ( 18.2) |       |
| P-value                                                                                         |                       |              |              | <.0001 |                                          |              |              | 0.947 |

<sup>a</sup> This table is limited to the 2,367 GDs who reported their generalist/specialist status. This includes enrollments as of October 31, 2013.

<sup>b</sup> P-values for the association between the characteristic and the procedure computed using Fisher's exact test (for categorical variables) and analysis of variance (for numerical variables).

GD: general dentist  
 AEGD: Advanced Education in General Dentistry  
 GPR: General Practice Residency  
 FAGD: Fellow of the Academy of General Dentistry  
 MAGD: Master of the Academy of General Dentistry

Frequency of provision of the three 'common' procedure types, by dentist, practice, and patient characteristics <sup>a,b</sup>

| Characteristic of the dentist, practice, or patient population | Endodontic therapy - molars |              |              |        | Implants     |              |              |        | Periodontal therapy – non-surgical |              |              |        |
|----------------------------------------------------------------|-----------------------------|--------------|--------------|--------|--------------|--------------|--------------|--------|------------------------------------|--------------|--------------|--------|
|                                                                | None                        | Occasionally | Routinely    | Total  | None         | Occasionally | Routinely    | Total  | None                               | Occasionally | Routinely    | Total  |
| Dentist gender                                                 |                             |              |              |        |              |              |              |        |                                    |              |              |        |
| Male                                                           | 577 (34.0)                  | 427 (25.2)   | 692 (40.8)   | 1696   | 577 (34.3)   | 674 (40.0)   | 432 (25.7)   | 1683   | 649 (38.3)                         | 649 (38.3)   | 395 (23.3)   | 1693   |
| Female                                                         | 303 (49.7)                  | 172 (28.2)   | 135 (22.1)   | 610    | 307 (50.2)   | 225 (36.8)   | 79 (12.9)    | 611    | 262 (42.7)                         | 206 (33.6)   | 145 (23.7)   | 613    |
| Missing/Blank                                                  | 3                           | 4            | 4            | 61     | 5            | 3            | 3            | 73     | 6                                  | 4            | 1            | 61     |
| P-value                                                        |                             |              |              | <.0001 |              |              |              | <.0001 |                                    |              |              | 0.078  |
| Dentist age in years                                           |                             |              |              |        |              |              |              |        |                                    |              |              |        |
| Mean (S.D.)                                                    | 52.1 ( 12.1)                | 49.1 ( 12.5) | 51.5 ( 11.4) |        | 51.5 ( 13.1) | 49.6 ( 11.6) | 53.1 ( 10.4) |        | 49.7 ( 12.2)                       | 52.1 ( 12.0) | 52.0 ( 11.7) |        |
| P-value                                                        |                             |              |              | <.0001 |              |              |              | <.0001 |                                    |              |              | <.0001 |
| Dentist Hispanic/Latino ethnicity                              |                             |              |              |        |              |              |              |        |                                    |              |              |        |
| Yes                                                            | 43 (37.1)                   | 30 (25.9)    | 43 (37.1)    | 116    | 39 (34.5)    | 49 (43.4)    | 25 (22.1)    | 113    | 36 (31.3)                          | 46 (40.0)    | 33 (28.7)    | 115    |
| No                                                             | 829 (38.1)                  | 563 (25.9)   | 782 (36.0)   | 2174   | 838 (38.7)   | 842 (38.9)   | 485 (22.4)   | 2165   | 873 (40.1)                         | 800 (36.8)   | 502 (23.1)   | 2175   |
| Missing/Blank                                                  | 11                          | 10           | 6            | 77     | 12           | 11           | 4            | 89     | 8                                  | 13           | 6            | 77     |
| P-value                                                        |                             |              |              | 0.965  |              |              |              | 0.602  |                                    |              |              | 0.134  |
| Dentist race                                                   |                             |              |              |        |              |              |              |        |                                    |              |              |        |
| White/Caucasian                                                | 767 (39.7)                  | 484 (25.1)   | 681 (35.2)   | 1932   | 715 (37.3)   | 750 (39.1)   | 453 (23.6)   | 1918   | 791 (41.0)                         | 732 (38.0)   | 405 (21.0)   | 1928   |
| Black/African-American                                         | 38 (34.9)                   | 28 (25.7)    | 43 (39.4)    | 109    | 67 (59.8)    | 30 (26.8)    | 15 (13.4)    | 112    | 28 (25.0)                          | 43 (38.4)    | 41 (36.6)    | 112    |
| American Indian/Alaska Native                                  | 5 (83.3)                    | 1 (16.7)     | 0 ( 0.0)     | 6      | 3 (50.0)     | 2 (33.3)     | 1 (16.7)     | 6      | 5 (83.3)                           | 1 (16.7)     | 0 ( 0.0)     | 6      |
| Asian                                                          | 42 (24.3)                   | 56 (32.4)    | 75 (43.4)    | 173    | 66 (38.2)    | 78 (45.1)    | 29 (16.8)    | 173    | 59 (33.9)                          | 51 (29.3)    | 64 (36.8)    | 174    |
| Native Hawaiian/Pacific Islander                               | 1 (50.0)                    | 1 (50.0)     | 0 ( 0.0)     | 2      | 2 ( 100)     | 0 ( 0.0)     | 0 ( 0.0)     | 2      | 2 ( 100)                           | 0 ( 0.0)     | 0 ( 0.0)     | 2      |
| Other                                                          | 21 (31.3)                   | 24 (35.8)    | 22 (32.8)    | 67     | 23 (34.3)    | 30 (44.8)    | 14 (20.9)    | 67     | 20 (29.9)                          | 22 (32.8)    | 25 (37.3)    | 67     |
| Missing/Blank                                                  | 9                           | 9            | 10           | 78     | 13           | 12           | 2            | 89     | 12                                 | 10           | 6            | 78     |
| P-value                                                        |                             |              |              | 0.001  |              |              |              | <.0001 |                                    |              |              | <.0001 |
| Year of graduation from dental school                          |                             |              |              |        |              |              |              |        |                                    |              |              |        |
| Mean (S.D.)                                                    | 1988 ( 12.5)                | 1992 ( 12.9) | 1989 ( 11.9) |        | 1989 ( 13.5) | 1991 ( 12.1) | 1987 ( 11.0) |        | 1991 ( 12.5)                       | 1988 ( 12.6) | 1989 ( 12.2) |        |
| P-value                                                        |                             |              |              | <.0001 |              |              |              | <.0001 |                                    |              |              | <.0001 |

| Characteristic of the dentist, practice, or patient population | Endodontic therapy - molars |              |            |        | Implants   |              |            |        | Periodontal therapy – non-surgical |              |            |       |
|----------------------------------------------------------------|-----------------------------|--------------|------------|--------|------------|--------------|------------|--------|------------------------------------|--------------|------------|-------|
|                                                                | None                        | Occasionally | Routinely  | Total  | None       | Occasionally | Routinely  | Total  | None                               | Occasionally | Routinely  | Total |
| After dental school: No formal training program                |                             |              |            |        |            |              |            |        |                                    |              |            |       |
| Yes                                                            | 423 (41.7)                  | 253 (24.9)   | 339 (33.4) | 1015   | 457 (45.2) | 401 (39.7)   | 152 (15.0) | 1010   | 437 (43.2)                         | 361 (35.7)   | 214 (21.1) | 1012  |
| No                                                             | 460 (35.3)                  | 350 (26.9)   | 492 (37.8) | 1302   | 432 (33.4) | 501 (38.7)   | 362 (28.0) | 1295   | 480 (36.8)                         | 498 (38.2)   | 327 (25.1) | 1305  |
| Missing/Blank                                                  | 0                           | 0            | 0          | 50     | 0          | 0            | 0          | 62     | 0                                  | 0            | 0          | 50    |
| P-value                                                        |                             |              |            | 0.008  |            |              |            | <.0001 |                                    |              |            | 0.005 |
| After dental school: Completed an AEGD program                 |                             |              |            |        |            |              |            |        |                                    |              |            |       |
| Yes                                                            | 87 (39.2)                   | 64 (28.8)    | 71 (32.0)  | 222    | 76 (34.2)  | 94 (42.3)    | 52 (23.4)  | 222    | 90 (40.5)                          | 81 (36.5)    | 51 (23.0)  | 222   |
| No                                                             | 796 (38.0)                  | 539 (25.7)   | 760 (36.3) | 2095   | 813 (39.0) | 808 (38.8)   | 462 (22.2) | 2083   | 827 (39.5)                         | 778 (37.1)   | 490 (23.4) | 2095  |
| Missing/Blank                                                  | 0                           | 0            | 0          | 50     | 0          | 0            | 0          | 62     | 0                                  | 0            | 0          | 50    |
| P-value                                                        |                             |              |            | 0.387  |            |              |            | 0.376  |                                    |              |            | 0.954 |
| After dental school: Completed a GPR program                   |                             |              |            |        |            |              |            |        |                                    |              |            |       |
| Yes                                                            | 172 (33.7)                  | 146 (28.6)   | 192 (37.6) | 510    | 180 (35.5) | 200 (39.4)   | 127 (25.0) | 507    | 181 (35.3)                         | 214 (41.7)   | 118 (23.0) | 513   |
| No                                                             | 711 (39.3)                  | 457 (25.3)   | 639 (35.4) | 1807   | 709 (39.4) | 702 (39.0)   | 387 (21.5) | 1798   | 736 (40.8)                         | 645 (35.8)   | 423 (23.4) | 1804  |
| Missing/Blank                                                  | 0                           | 0            | 0          | 50     | 0          | 0            | 0          | 62     | 0                                  | 0            | 0          | 50    |
| P-value                                                        |                             |              |            | 0.059  |            |              |            | 0.151  |                                    |              |            | 0.031 |
| After dental school: I am a FAGD                               |                             |              |            |        |            |              |            |        |                                    |              |            |       |
| Yes                                                            | 99 (30.7)                   | 71 (22.0)    | 152 (47.2) | 322    | 87 (26.9)  | 135 (41.7)   | 102 (31.5) | 324    | 109 (33.7)                         | 130 (40.2)   | 84 (26.0)  | 323   |
| No                                                             | 784 (39.3)                  | 532 (26.7)   | 679 (34.0) | 1995   | 802 (40.5) | 767 (38.7)   | 412 (20.8) | 1981   | 808 (40.5)                         | 729 (36.6)   | 457 (22.9) | 1994  |
| Missing/Blank                                                  | 0                           | 0            | 0          | 50     | 0          | 0            | 0          | 62     | 0                                  | 0            | 0          | 50    |
| P-value                                                        |                             |              |            | <.0001 |            |              |            | <.0001 |                                    |              |            | 0.069 |
| After dental school: Completed MAGD                            |                             |              |            |        |            |              |            |        |                                    |              |            |       |
| Yes                                                            | 38 (28.8)                   | 31 (23.5)    | 63 (47.7)  | 132    | 29 (22.0)  | 55 (41.7)    | 48 (36.4)  | 132    | 48 (36.4)                          | 51 (38.6)    | 33 (25.0)  | 132   |
| No                                                             | 845 (38.7)                  | 572 (26.2)   | 768 (35.1) | 2185   | 860 (39.6) | 847 (39.0)   | 466 (21.4) | 2173   | 869 (39.8)                         | 808 (37.0)   | 508 (23.2) | 2185  |
| Missing/Blank                                                  | 0                           | 0            | 0          | 50     | 0          | 0            | 0          | 62     | 0                                  | 0            | 0          | 50    |
| P-value                                                        |                             |              |            | 0.013  |            |              |            | <.0001 |                                    |              |            | 0.721 |

| Characteristic of the dentist, practice, or patient population | Endodontic therapy - molars |              |            |        | Implants   |              |            |        | Periodontal therapy – non-surgical |              |            |        |
|----------------------------------------------------------------|-----------------------------|--------------|------------|--------|------------|--------------|------------|--------|------------------------------------|--------------|------------|--------|
|                                                                | None                        | Occasionally | Routinely  | Total  | None       | Occasionally | Routinely  | Total  | None                               | Occasionally | Routinely  | Total  |
| After dental school: Completed some other training program     |                             |              |            |        |            |              |            |        |                                    |              |            |        |
| Yes                                                            | 186 (36.6)                  | 128 (25.2)   | 194 (38.2) | 508    | 152 (30.0) | 174 (34.4)   | 180 (35.6) | 506    | 176 (34.6)                         | 183 (36.0)   | 149 (29.3) | 508    |
| No                                                             | 697 (38.5)                  | 475 (26.3)   | 637 (35.2) | 1809   | 737 (41.0) | 728 (40.5)   | 334 (18.6) | 1799   | 741 (41.0)                         | 676 (37.4)   | 392 (21.7) | 1809   |
| Missing/Blank                                                  | 0                           | 0            | 0          | 50     | 0          | 0            | 0          | 62     | 0                                  | 0            | 0          | 50     |
| P-value                                                        |                             |              |            | 0.470  |            |              |            | <.0001 |                                    |              |            | 0.001  |
| Member of: American Dental Association                         |                             |              |            |        |            |              |            |        |                                    |              |            |        |
| Yes                                                            | 676 (37.1)                  | 485 (26.6)   | 662 (36.3) | 1823   | 638 (35.2) | 734 (40.5)   | 441 (24.3) | 1813   | 727 (39.9)                         | 676 (37.1)   | 419 (23.0) | 1822   |
| No                                                             | 207 (41.9)                  | 118 (23.9)   | 169 (34.2) | 494    | 251 (51.0) | 168 (34.1)   | 73 (14.8)  | 492    | 190 (38.4)                         | 183 (37.0)   | 122 (24.6) | 495    |
| Missing/Blank                                                  | 0                           | 0            | 0          | 50     | 0          | 0            | 0          | 62     | 0                                  | 0            | 0          | 50     |
| P-value                                                        |                             |              |            | 0.150  |            |              |            | <.0001 |                                    |              |            | 0.713  |
| Member of: Academy of General Dentistry                        |                             |              |            |        |            |              |            |        |                                    |              |            |        |
| Yes                                                            | 312 (35.5)                  | 221 (25.2)   | 345 (39.3) | 878    | 265 (30.1) | 371 (42.2)   | 244 (27.7) | 880    | 320 (36.4)                         | 357 (40.7)   | 201 (22.9) | 878    |
| No                                                             | 571 (39.7)                  | 382 (26.5)   | 486 (33.8) | 1439   | 624 (43.8) | 531 (37.3)   | 270 (18.9) | 1425   | 597 (41.5)                         | 502 (34.9)   | 340 (23.6) | 1439   |
| Missing/Blank                                                  | 0                           | 0            | 0          | 50     | 0          | 0            | 0          | 62     | 0                                  | 0            | 0          | 50     |
| P-value                                                        |                             |              |            | 0.025  |            |              |            | <.0001 |                                    |              |            | 0.014  |
| Hours in practice in patient contact                           |                             |              |            |        |            |              |            |        |                                    |              |            |        |
| 32 or more hours                                               | 660 (34.3)                  | 515 (26.8)   | 749 (38.9) | 1924   | 682 (35.6) | 778 (40.6)   | 455 (23.8) | 1915   | 729 (37.9)                         | 720 (37.4)   | 476 (24.7) | 1925   |
| Less than 32 hours                                             | 214 (57.2)                  | 86 (23.0)    | 74 (19.8)  | 374    | 201 (54.2) | 116 (31.3)   | 54 (14.6)  | 371    | 182 (48.9)                         | 132 (35.5)   | 58 (15.6)  | 372    |
| Missing/Blank                                                  | 9                           | 2            | 8          | 69     | 6          | 8            | 5          | 81     | 6                                  | 7            | 7          | 70     |
| P-value                                                        |                             |              |            | <.0001 |            |              |            | <.0001 |                                    |              |            | <.0001 |
| Number of different locations at which you see patients        |                             |              |            |        |            |              |            |        |                                    |              |            |        |
| 1 location                                                     | 772 (39.3)                  | 487 (24.8)   | 707 (36.0) | 1966   | 744 (38.0) | 770 (39.4)   | 442 (22.6) | 1956   | 797 (40.5)                         | 721 (36.6)   | 450 (22.9) | 1968   |
| 2 locations                                                    | 83 (29.9)                   | 91 (32.7)    | 104 (37.4) | 278    | 103 (37.3) | 108 (39.1)   | 65 (23.6)  | 276    | 98 (35.4)                          | 105 (37.9)   | 74 (26.7)  | 277    |
| 3 locations                                                    | 14 (32.6)                   | 13 (30.2)    | 16 (37.2)  | 43     | 22 (51.2)  | 16 (37.2)    | 5 (11.6)   | 43     | 13 (30.2)                          | 17 (39.5)    | 13 (30.2)  | 43     |
| More than 3                                                    | 14 (46.7)                   | 12 (40.0)    | 4 (13.3)   | 30     | 20 (66.7)  | 8 (26.7)     | 2 ( 6.7)   | 30     | 9 (31.0)                           | 16 (55.2)    | 4 (13.8)   | 29     |
| Missing/Blank                                                  | 0                           | 0            | 0          | 50     | 0          | 0            | 0          | 62     | 0                                  | 0            | 0          | 50     |
| P-value                                                        |                             |              |            | 0.002  |            |              |            | 0.023  |                                    |              |            | 0.162  |

| Characteristic of the dentist, practice, or patient population                                          | Endodontic therapy - molars |              |            |        | Implants   |              |            |        | Periodontal therapy – non-surgical |              |            |        |
|---------------------------------------------------------------------------------------------------------|-----------------------------|--------------|------------|--------|------------|--------------|------------|--------|------------------------------------|--------------|------------|--------|
|                                                                                                         | None                        | Occasionally | Routinely  | Total  | None       | Occasionally | Routinely  | Total  | None                               | Occasionally | Routinely  | Total  |
| Practice location                                                                                       |                             |              |            |        |            |              |            |        |                                    |              |            |        |
| Inner City of Urban Area                                                                                | 116 (42.3)                  | 68 (24.8)    | 90 (32.8)  | 274    | 138 (50.5) | 92 (33.7)    | 43 (15.8)  | 273    | 96 (34.9)                          | 100 (36.4)   | 79 (28.7)  | 275    |
| Urban (not inner city)                                                                                  | 285 (44.3)                  | 151 (23.5)   | 207 (32.2) | 643    | 251 (39.0) | 256 (39.8)   | 136 (21.2) | 643    | 270 (41.7)                         | 229 (35.4)   | 148 (22.9) | 647    |
| Suburban                                                                                                | 340 (33.4)                  | 297 (29.1)   | 382 (37.5) | 1019   | 340 (33.6) | 396 (39.2)   | 275 (27.2) | 1011   | 414 (40.8)                         | 369 (36.4)   | 231 (22.8) | 1014   |
| Rural                                                                                                   | 140 (37.7)                  | 85 (22.9)    | 146 (39.4) | 371    | 156 (42.4) | 153 (41.6)   | 59 (16.0)  | 368    | 133 (35.8)                         | 159 (42.9)   | 79 (21.3)  | 371    |
| Missing/Blank                                                                                           | 2                           | 2            | 6          | 60     | 4          | 5            | 1          | 72     | 4                                  | 2            | 4          | 60     |
| P-value                                                                                                 |                             |              |            | 0.001  |            |              |            | <.0001 |                                    |              |            | 0.063  |
| Type of main practice (full)                                                                            |                             |              |            |        |            |              |            |        |                                    |              |            |        |
| Owner of private practice                                                                               | 592 (36.1)                  | 383 (23.4)   | 665 (40.5) | 1640   | 513 (31.4) | 675 (41.3)   | 445 (27.3) | 1633   | 573 (34.9)                         | 622 (37.9)   | 445 (27.1) | 1640   |
| Associate or employee of a private practice                                                             | 120 (37.7)                  | 97 (30.5)    | 101 (31.8) | 318    | 142 (44.9) | 132 (41.8)   | 42 (13.3)  | 316    | 159 (50.3)                         | 108 (34.2)   | 49 (15.5)  | 316    |
| HealthPartners Dental Group                                                                             | 11 (21.6)                   | 25 (49.0)    | 15 (29.4)  | 51     | 30 (60.0)  | 17 (34.0)    | 3 ( 6.0)   | 50     | 38 (74.5)                          | 12 (23.5)    | 1 ( 2.0)   | 51     |
| Permanente Dental Associates                                                                            | 18 (28.6)                   | 31 (49.2)    | 14 (22.2)  | 63     | 36 (57.1)  | 26 (41.3)    | 1 ( 1.6)   | 63     | 30 (47.6)                          | 32 (50.8)    | 1 ( 1.6)   | 63     |
| Other managed care or preferred provider organization                                                   | 4 (23.5)                    | 6 (35.3)     | 7 (41.2)   | 17     | 8 (47.1)   | 8 (47.1)     | 1 ( 5.9)   | 17     | 12 (70.6)                          | 4 (23.5)     | 1 ( 5.9)   | 17     |
| Public health practice, community health center, or publicly-funded clinic (but not a federal facility) | 72 (61.5)                   | 29 (24.8)    | 16 (13.7)  | 117    | 101 (87.1) | 14 (12.1)    | 1 ( 0.9)   | 116    | 49 (41.5)                          | 46 (39.0)    | 23 (19.5)  | 118    |
| Federal government facility (VA, DoD, Public Health Service)                                            | 16 (42.1)                   | 17 (44.7)    | 5 (13.2)   | 38     | 21 (55.3)  | 11 (28.9)    | 6 (15.8)   | 38     | 15 (39.5)                          | 15 (39.5)    | 8 (21.1)   | 38     |
| Dental school, academic institution, or facility staffed by dental school                               | 47 (71.2)                   | 11 (16.7)    | 8 (12.1)   | 66     | 36 (54.5)  | 16 (24.2)    | 14 (21.2)  | 66     | 37 (55.2)                          | 18 (26.9)    | 12 (17.9)  | 67     |
| Missing/Blank                                                                                           | 3                           | 4            | 0          | 57     | 2          | 3            | 1          | 68     | 4                                  | 2            | 1          | 57     |
| P-value                                                                                                 |                             |              |            | <.0001 |            |              |            | <.0001 |                                    |              |            | <.0001 |
| Type of main practice (private)                                                                         |                             |              |            |        |            |              |            |        |                                    |              |            |        |
| Private                                                                                                 | 745 (35.7)                  | 542 (25.9)   | 802 (38.4) | 2089   | 729 (35.1) | 858 (41.3)   | 492 (23.7) | 2079   | 812 (38.9)                         | 778 (37.3)   | 497 (23.8) | 2087   |
| Non private                                                                                             | 135 (61.1)                  | 57 (25.8)    | 29 (13.1)  | 221    | 158 (71.8) | 41 (18.6)    | 21 ( 9.5)  | 220    | 101 (45.3)                         | 79 (35.4)    | 43 (19.3)  | 223    |
| Missing/Blank                                                                                           | 3                           | 4            | 0          | 57     | 2          | 3            | 1          | 68     | 4                                  | 2            | 1          | 57     |
| P-value                                                                                                 |                             |              |            | <.0001 |            |              |            | <.0001 |                                    |              |            | 0.137  |
| At the same location: Not applicable-only GDs at this location                                          |                             |              |            |        |            |              |            |        |                                    |              |            |        |
| Yes                                                                                                     | 720 (37.4)                  | 502 (26.1)   | 704 (36.6) | 1926   | 699 (36.5) | 781 (40.7)   | 437 (22.8) | 1917   | 722 (37.5)                         | 728 (37.8)   | 476 (24.7) | 1926   |

| Characteristic of the dentist, practice, or patient population | Endodontic therapy - molars |              |            |        | Implants   |              |            |        | Periodontal therapy – non-surgical |              |            |        |
|----------------------------------------------------------------|-----------------------------|--------------|------------|--------|------------|--------------|------------|--------|------------------------------------|--------------|------------|--------|
|                                                                | None                        | Occasionally | Routinely  | Total  | None       | Occasionally | Routinely  | Total  | None                               | Occasionally | Routinely  | Total  |
| No                                                             | 163 (41.7)                  | 101 (25.8)   | 127 (32.5) | 391    | 190 (49.0) | 121 (31.2)   | 77 (19.8)  | 388    | 195 (49.9)                         | 131 (33.5)   | 65 (16.6)  | 391    |
| Missing/Blank                                                  | 0                           | 0            | 0          | 50     | 0          | 0            | 0          | 62     | 0                                  | 0            | 0          | 50     |
| P-value                                                        |                             |              |            | 0.222  |            |              |            | <.0001 |                                    |              |            | <.0001 |
| At the same location: Endodontist                              |                             |              |            |        |            |              |            |        |                                    |              |            |        |
| Yes                                                            | 57 (51.8)                   | 34 (30.9)    | 19 (17.3)  | 110    | 48 (44.0)  | 37 (33.9)    | 24 (22.0)  | 109    | 61 (55.0)                          | 38 (34.2)    | 12 (10.8)  | 111    |
| No                                                             | 826 (37.4)                  | 569 (25.8)   | 812 (36.8) | 2207   | 841 (38.3) | 865 (39.4)   | 490 (22.3) | 2196   | 856 (38.8)                         | 821 (37.2)   | 529 (24.0) | 2206   |
| Missing/Blank                                                  | 0                           | 0            | 0          | 50     | 0          | 0            | 0          | 62     | 0                                  | 0            | 0          | 50     |
| P-value                                                        |                             |              |            | <.0001 |            |              |            | 0.431  |                                    |              |            | 0.0005 |
| At the same location: Oral & Maxillofacial Surgeon             |                             |              |            |        |            |              |            |        |                                    |              |            |        |
| Yes                                                            | 44 (48.9)                   | 23 (25.6)    | 23 (25.6)  | 90     | 43 (47.3)  | 27 (29.7)    | 21 (23.1)  | 91     | 43 (47.3)                          | 35 (38.5)    | 13 (14.3)  | 91     |
| No                                                             | 839 (37.7)                  | 580 (26.0)   | 808 (36.3) | 2227   | 846 (38.2) | 875 (39.5)   | 493 (22.3) | 2214   | 874 (39.3)                         | 824 (37.0)   | 528 (23.7) | 2226   |
| Missing/Blank                                                  | 0                           | 0            | 0          | 50     | 0          | 0            | 0          | 62     | 0                                  | 0            | 0          | 50     |
| P-value                                                        |                             |              |            | 0.060  |            |              |            | 0.124  |                                    |              |            | 0.079  |
| At the same location: Orthodontist                             |                             |              |            |        |            |              |            |        |                                    |              |            |        |
| Yes                                                            | 48 (39.0)                   | 34 (27.6)    | 41 (33.3)  | 123    | 60 (49.2)  | 35 (28.7)    | 27 (22.1)  | 122    | 72 (58.5)                          | 31 (25.2)    | 20 (16.3)  | 123    |
| No                                                             | 835 (38.1)                  | 569 (25.9)   | 790 (36.0) | 2194   | 829 (38.0) | 867 (39.7)   | 487 (22.3) | 2183   | 845 (38.5)                         | 828 (37.7)   | 521 (23.7) | 2194   |
| Missing/Blank                                                  | 0                           | 0            | 0          | 50     | 0          | 0            | 0          | 62     | 0                                  | 0            | 0          | 50     |
| P-value                                                        |                             |              |            | 0.809  |            |              |            | 0.023  |                                    |              |            | <.0001 |
| At the same location: Pediatric dentist                        |                             |              |            |        |            |              |            |        |                                    |              |            |        |
| Yes                                                            | 36 (36.4)                   | 38 (38.4)    | 25 (25.3)  | 99     | 60 (60.6)  | 22 (22.2)    | 17 (17.2)  | 99     | 56 (56.0)                          | 36 (36.0)    | 8 (8.0)    | 100    |
| No                                                             | 847 (38.2)                  | 565 (25.5)   | 806 (36.3) | 2218   | 829 (37.6) | 880 (39.9)   | 497 (22.5) | 2206   | 861 (38.8)                         | 823 (37.1)   | 533 (24.0) | 2217   |
| Missing/Blank                                                  | 0                           | 0            | 0          | 50     | 0          | 0            | 0          | 62     | 0                                  | 0            | 0          | 50     |
| P-value                                                        |                             |              |            | 0.010  |            |              |            | <.0001 |                                    |              |            | <.0001 |
| At the same location: Periodontist                             |                             |              |            |        |            |              |            |        |                                    |              |            |        |
| Yes                                                            | 59 (41.8)                   | 47 (33.3)    | 35 (24.8)  | 141    | 55 (39.3)  | 48 (34.3)    | 37 (26.4)  | 140    | 82 (57.3)                          | 45 (31.5)    | 16 (11.2)  | 143    |
| No                                                             | 824 (37.9)                  | 556 (25.6)   | 796 (36.6) | 2176   | 834 (38.5) | 854 (39.4)   | 477 (22.0) | 2165   | 835 (38.4)                         | 814 (37.4)   | 525 (24.1) | 2174   |
| Missing/Blank                                                  | 0                           | 0            | 0          | 50     | 0          | 0            | 0          | 62     | 0                                  | 0            | 0          | 50     |

| Characteristic of the dentist, practice, or patient population         | Endodontic therapy - molars |              |              |        | Implants     |              |             |        | Periodontal therapy – non-surgical |              |              |        |
|------------------------------------------------------------------------|-----------------------------|--------------|--------------|--------|--------------|--------------|-------------|--------|------------------------------------|--------------|--------------|--------|
|                                                                        | None                        | Occasionally | Routinely    | Total  | None         | Occasionally | Routinely   | Total  | None                               | Occasionally | Routinely    | Total  |
| P-value                                                                |                             |              |              | 0.012  |              |              |             | 0.350  |                                    |              |              | <.0001 |
| At the same location: Prosthodontist                                   |                             |              |              |        |              |              |             |        |                                    |              |              |        |
| Yes                                                                    | 33 (47.8)                   | 24 (34.8)    | 12 (17.4)    | 69     | 35 (50.7)    | 20 (29.0)    | 14 (20.3)   | 69     | 34 (48.6)                          | 26 (37.1)    | 10 (14.3)    | 70     |
| No                                                                     | 850 (37.8)                  | 579 (25.8)   | 819 (36.4)   | 2248   | 854 (38.2)   | 882 (39.4)   | 500 (22.4)  | 2236   | 883 (39.3)                         | 833 (37.1)   | 531 (23.6)   | 2247   |
| Missing/Blank                                                          | 0                           | 0            | 0            | 50     | 0            | 0            | 0           | 62     | 0                                  | 0            | 0            | 50     |
| P-value                                                                |                             |              |              | 0.003  |              |              |             | 0.106  |                                    |              |              | 0.128  |
| At the same location: Other                                            |                             |              |              |        |              |              |             |        |                                    |              |              |        |
| Yes                                                                    | 29 (54.7)                   | 6 (11.3)     | 18 (34.0)    | 53     | 31 (57.4)    | 9 (16.7)     | 14 (25.9)   | 54     | 26 (49.1)                          | 12 (22.6)    | 15 (28.3)    | 53     |
| No                                                                     | 854 (37.7)                  | 597 (26.4)   | 813 (35.9)   | 2264   | 858 (38.1)   | 893 (39.7)   | 500 (22.2)  | 2251   | 891 (39.4)                         | 847 (37.4)   | 526 (23.2)   | 2264   |
| Missing/Blank                                                          | 0                           | 0            | 0            | 50     | 0            | 0            | 0           | 62     | 0                                  | 0            | 0            | 50     |
| P-value                                                                |                             |              |              | 0.014  |              |              |             | 0.001  |                                    |              |              | 0.075  |
| How long a patient has to wait: for a new patient exam appt in days    |                             |              |              |        |              |              |             |        |                                    |              |              |        |
| Mean (S.D.)                                                            | 8.5 ( 15.1)                 | 7.7 ( 11.0)  | 5.7 ( 8.5)   |        | 9.0 ( 16.2)  | 6.5 ( 9.0)   | 5.8 ( 7.7)  |        | 8.0 ( 14.5)                        | 7.2 ( 10.0)  | 6.2 ( 10.4)  |        |
| P-value                                                                |                             |              |              | <.0001 |              |              |             | <.0001 |                                    |              |              | 0.024  |
| How long a patient has to wait: for a treatment procedure appt in days |                             |              |              |        |              |              |             |        |                                    |              |              |        |
| Mean (S.D.)                                                            | 8.3 ( 15.4)                 | 7.6 ( 9.8)   | 5.7 ( 7.8)   |        | 8.6 ( 15.3)  | 6.6 ( 9.6)   | 5.9 ( 7.4)  |        | 8.0 ( 15.0)                        | 7.2 ( 9.1)   | 5.8 ( 8.6)   |        |
| P-value                                                                |                             |              |              | <.0001 |              |              |             | <.0001 |                                    |              |              | 0.002  |
| How long a patient has to wait: in the waiting room in mins            |                             |              |              |        |              |              |             |        |                                    |              |              |        |
| Mean (S.D.)                                                            | 8.5 ( 9.0)                  | 8.3 ( 7.7)   | 8.4 ( 7.1)   |        | 9.7 ( 10.0)  | 7.9 ( 6.8)   | 7.0 ( 5.2)  |        | 8.1 ( 8.2)                         | 8.5 ( 8.3)   | 8.9 ( 7.0)   |        |
| P-value                                                                |                             |              |              | 0.832  |              |              |             | <.0001 |                                    |              |              | 0.243  |
| Percentage of patients who are: 1-18 years old                         |                             |              |              |        |              |              |             |        |                                    |              |              |        |
| Mean (S.D.)                                                            | 18.3 ( 19.2)                | 17.5 ( 14.7) | 17.1 ( 10.8) |        | 21.3 ( 21.2) | 16.5 ( 10.7) | 13.5 ( 7.9) |        | 17.3 ( 14.6)                       | 17.6 ( 16.2) | 18.5 ( 16.1) |        |
| P-value                                                                |                             |              |              | 0.282  |              |              |             | <.0001 |                                    |              |              | 0.359  |



| Characteristic of the dentist, practice, or patient population      | Endodontic therapy - molars |              |              |       | Implants     |              |              |        | Periodontal therapy – non-surgical |              |              |        |
|---------------------------------------------------------------------|-----------------------------|--------------|--------------|-------|--------------|--------------|--------------|--------|------------------------------------|--------------|--------------|--------|
|                                                                     | None                        | Occasionally | Routinely    | Total | None         | Occasionally | Routinely    | Total  | None                               | Occasionally | Routinely    | Total  |
| Percentage of patients who are: 19-44 years old                     |                             |              |              |       |              |              |              |        |                                    |              |              |        |
| Mean (S.D.)                                                         | 28.0 ( 13.5)                | 29.5 ( 12.5) | 29.4 ( 10.9) |       | 28.1 ( 13.8) | 30.2 ( 11.5) | 28.2 ( 11.4) |        | 29.5 ( 12.6)                       | 28.2 ( 12.1) | 28.9 ( 12.8) |        |
| P-value                                                             |                             |              |              | 0.026 |              |              |              | 0.001  |                                    |              |              | 0.091  |
| Percentage of patients who are: 45-64 years old                     |                             |              |              |       |              |              |              |        |                                    |              |              |        |
| Mean (S.D.)                                                         | 33.0 ( 13.5)                | 33.1 ( 11.5) | 34.0 ( 10.8) |       | 31.9 ( 13.8) | 33.2 ( 10.8) | 35.9 ( 10.7) |        | 33.5 ( 11.7)                       | 33.5 ( 12.3) | 32.7 ( 12.5) |        |
| P-value                                                             |                             |              |              | 0.193 |              |              |              | <.0001 |                                    |              |              | 0.426  |
| Percentage of patients who are: 65 or older                         |                             |              |              |       |              |              |              |        |                                    |              |              |        |
| Mean (S.D.)                                                         | 20.7 ( 13.4)                | 20.0 ( 11.0) | 19.5 ( 9.7)  |       | 18.8 ( 12.5) | 20.1 ( 10.4) | 22.4 ( 11.6) |        | 19.7 ( 11.4)                       | 20.7 ( 12.1) | 19.8 ( 11.1) |        |
| P-value                                                             |                             |              |              | 0.098 |              |              |              | <.0001 |                                    |              |              | 0.167  |
| Percentage of patients who are of Hispanic/Latino ethnicity         |                             |              |              |       |              |              |              |        |                                    |              |              |        |
| Mean (S.D.)                                                         | 15.6 ( 19.9)                | 14.4 ( 17.7) | 15.3 ( 19.3) |       | 18.2 ( 23.0) | 13.6 ( 16.4) | 12.8 ( 15.1) |        | 13.3 ( 17.2)                       | 14.6 ( 18.5) | 19.2 ( 22.2) |        |
| P-value                                                             |                             |              |              | 0.507 |              |              |              | <.0001 |                                    |              |              | <.0001 |
| Percentage of patients whose race is: White/Caucasian               |                             |              |              |       |              |              |              |        |                                    |              |              |        |
| Mean (S.D.)                                                         | 68.6 ( 23.6)                | 67.5 ( 23.7) | 69.5 ( 22.7) |       | 64.6 ( 26.4) | 70.0 ( 21.4) | 73.2 ( 19.6) |        | 70.8 ( 21.0)                       | 68.9 ( 23.7) | 64.3 ( 25.9) |        |
| P-value                                                             |                             |              |              | 0.284 |              |              |              | <.0001 |                                    |              |              | <.0001 |
| Percentage of patients whose race is: Black/African-American        |                             |              |              |       |              |              |              |        |                                    |              |              |        |
| Mean (S.D.)                                                         | 17.6 ( 17.9)                | 16.1 ( 16.4) | 16.5 ( 16.4) |       | 19.2 ( 19.8) | 16.0 ( 15.4) | 14.2 ( 13.9) |        | 15.8 ( 15.3)                       | 16.8 ( 17.5) | 18.7 ( 18.9) |        |
| P-value                                                             |                             |              |              | 0.185 |              |              |              | <.0001 |                                    |              |              | 0.007  |
| Percentage of patients whose race is: American Indian/Alaska Native |                             |              |              |       |              |              |              |        |                                    |              |              |        |
| Mean (S.D.)                                                         | 1.3 ( 4.6)                  | 2.3 ( 10.0)  | 1.6 ( 6.6)   |       | 2.1 ( 9.1)   | 1.6 ( 5.7)   | 1.1 ( 4.8)   |        | 1.4 ( 4.7)                         | 1.7 ( 7.1)   | 2.0 ( 9.7)   |        |
| P-value                                                             |                             |              |              | 0.035 |              |              |              | 0.038  |                                    |              |              | 0.313  |

| Characteristic of the dentist, practice, or patient population                                   | Endodontic therapy - molars |              |              |        | Implants     |              |              |        | Periodontal therapy – non-surgical |              |              |       |
|--------------------------------------------------------------------------------------------------|-----------------------------|--------------|--------------|--------|--------------|--------------|--------------|--------|------------------------------------|--------------|--------------|-------|
|                                                                                                  | None                        | Occasionally | Routinely    | Total  | None         | Occasionally | Routinely    | Total  | None                               | Occasionally | Routinely    | Total |
| Percentage of patients whose race is: Asian                                                      |                             |              |              |        |              |              |              |        |                                    |              |              |       |
| Mean (S.D.)                                                                                      | 5.8 ( 6.5)                  | 7.1 ( 8.2)   | 6.3 ( 8.2)   |        | 5.9 ( 8.0)   | 6.6 ( 7.5)   | 6.6 ( 6.9)   |        | 6.4 ( 6.6)                         | 6.0 ( 7.0)   | 6.8 ( 9.7)   |       |
| P-value                                                                                          |                             |              |              | 0.006  |              |              |              | 0.157  |                                    |              |              | 0.143 |
| Percentage of patients whose race is: Native Hawaiian/Pacific Islander                           |                             |              |              |        |              |              |              |        |                                    |              |              |       |
| Mean (S.D.)                                                                                      | 0.7 ( 2.1)                  | 1.0 ( 2.4)   | 0.7 ( 2.4)   |        | 0.7 ( 2.1)   | 0.9 ( 2.6)   | 0.8 ( 2.2)   |        | 0.7 ( 2.3)                         | 0.8 ( 2.3)   | 0.8 ( 2.4)   |       |
| P-value                                                                                          |                             |              |              | 0.076  |              |              |              | 0.288  |                                    |              |              | 0.595 |
| Percentage of patients whose race is: Other                                                      |                             |              |              |        |              |              |              |        |                                    |              |              |       |
| Mean (S.D.)                                                                                      | 5.9 ( 15.2)                 | 6.0 ( 15.4)  | 5.4 ( 14.3)  |        | 7.5 ( 18.4)  | 5.0 ( 12.8)  | 4.2 ( 10.9)  |        | 4.9 ( 13.2)                        | 5.8 ( 15.1)  | 7.4 ( 17.4)  |       |
| P-value                                                                                          |                             |              |              | 0.728  |              |              |              | <.0001 |                                    |              |              | 0.010 |
| Percentage of patients: Covered by a private insurance program                                   |                             |              |              |        |              |              |              |        |                                    |              |              |       |
| Mean (S.D.)                                                                                      | 55.6 ( 27.2)                | 60.2 ( 26.7) | 61.5 ( 20.9) |        | 53.0 ( 29.4) | 63.0 ( 22.3) | 61.6 ( 19.6) |        | 60.0 ( 25.4)                       | 59.5 ( 25.4) | 55.8 ( 24.2) |       |
| P-value                                                                                          |                             |              |              | <.0001 |              |              |              | <.0001 |                                    |              |              | 0.005 |
| Percentage of patients: Covered by a public program                                              |                             |              |              |        |              |              |              |        |                                    |              |              |       |
| Mean (S.D.)                                                                                      | 15.2 ( 25.9)                | 15.8 ( 25.6) | 11.8 ( 19.1) |        | 21.5 ( 29.0) | 11.4 ( 19.7) | 6.4 ( 15.4)  |        | 14.1 ( 23.5)                       | 13.3 ( 23.4) | 15.8 ( 24.8) |       |
| P-value                                                                                          |                             |              |              | 0.002  |              |              |              | <.0001 |                                    |              |              | 0.159 |
| Percentage of patients: Not covered by any third party and pays out of pocket                    |                             |              |              |        |              |              |              |        |                                    |              |              |       |
| Mean (S.D.)                                                                                      | 24.2 ( 19.3)                | 20.7 ( 17.1) | 23.7 ( 15.9) |        | 19.9 ( 18.2) | 22.6 ( 16.0) | 29.4 ( 17.5) |        | 22.3 ( 18.3)                       | 23.1 ( 17.2) | 24.3 ( 16.9) |       |
| P-value                                                                                          |                             |              |              | 0.0004 |              |              |              | <.0001 |                                    |              |              | 0.103 |
| Percent of patients: Receiving free care or substantially reduced fees courtesy of this practice |                             |              |              |        |              |              |              |        |                                    |              |              |       |
| Mean (S.D.)                                                                                      | 5.1 ( 13.5)                 | 3.2 ( 8.7)   | 3.0 ( 7.3)   |        | 5.6 ( 14.2)  | 2.9 ( 7.6)   | 2.3 ( 3.9)   |        | 3.5 ( 10.2)                        | 4.0 ( 10.4)  | 4.1 ( 11.0)  |       |
| P-value                                                                                          |                             |              |              | <.0001 |              |              |              | <.0001 |                                    |              |              | 0.481 |

| Characteristic of the dentist, practice, or patient population                                  | Endodontic therapy - molars |              |              |       | Implants     |              |              |        | Periodontal therapy – non-surgical |              |              |       |
|-------------------------------------------------------------------------------------------------|-----------------------------|--------------|--------------|-------|--------------|--------------|--------------|--------|------------------------------------|--------------|--------------|-------|
|                                                                                                 | None                        | Occasionally | Routinely    | Total | None         | Occasionally | Routinely    | Total  | None                               | Occasionally | Routinely    | Total |
| Percent of patients who come: For one visit only                                                |                             |              |              |       |              |              |              |        |                                    |              |              |       |
| Mean (S.D.)                                                                                     | 9.1 ( 11.8)                 | 8.6 ( 9.1)   | 8.1 ( 7.7)   |       | 9.9 ( 11.7)  | 8.3 ( 8.3)   | 7.0 ( 9.2)   |        | 8.8 ( 11.6)                        | 8.0 ( 7.9)   | 9.3 ( 9.9)   |       |
| P-value                                                                                         |                             |              |              | 0.130 |              |              |              | <.0001 |                                    |              |              | 0.053 |
| Percent of patients who come: Occasionally only when they have an emergency or specific problem |                             |              |              |       |              |              |              |        |                                    |              |              |       |
| Mean (S.D.)                                                                                     | 12.7 ( 9.9)                 | 13.0 ( 9.5)  | 13.4 ( 9.3)  |       | 14.5 ( 11.4) | 12.7 ( 7.9)  | 11.3 ( 8.5)  |        | 12.7 ( 9.5)                        | 13.0 ( 9.3)  | 13.8 ( 10.0) |       |
| P-value                                                                                         |                             |              |              | 0.338 |              |              |              | <.0001 |                                    |              |              | 0.119 |
| Percent of patients who come: Irregularly whether or not they have a problem                    |                             |              |              |       |              |              |              |        |                                    |              |              |       |
| Mean (S.D.)                                                                                     | 16.2 ( 11.4)                | 15.7 ( 9.4)  | 16.5 ( 10.1) |       | 16.4 ( 11.1) | 16.5 ( 10.0) | 15.2 ( 10.0) |        | 15.9 ( 10.4)                       | 16.5 ( 11.0) | 16.2 ( 9.8)  |       |
| P-value                                                                                         |                             |              |              | 0.415 |              |              |              | 0.059  |                                    |              |              | 0.542 |
| Percent of patients who come: Regularly as recommended or whether or not they have a problem    |                             |              |              |       |              |              |              |        |                                    |              |              |       |
| Mean (S.D.)                                                                                     | 62.0 ( 21.3)                | 62.7 ( 19.0) | 62.0 ( 18.2) |       | 59.2 ( 21.6) | 62.5 ( 18.0) | 66.5 ( 18.1) |        | 62.6 ( 20.2)                       | 62.6 ( 19.1) | 60.8 ( 19.6) |       |
| P-value                                                                                         |                             |              |              | 0.751 |              |              |              | <.0001 |                                    |              |              | 0.184 |

<sup>a</sup> This table is limited to the 2,367 GDs who reported their generalist/specialist status. This includes enrollments as of October 31, 2013.

<sup>b</sup> P-values for the association between the characteristic and the procedure computed using Fisher's exact test (for categorical variables) and analysis of variance (for numerical variables).

GD: general dentist  
 AEGD: Advanced Education in General Dentistry  
 GPR: General Practice Residency  
 FAGD: Fellow of the Academy of General Dentistry  
 MAGD: Master of the Academy of General Dentistry

Frequency of provision of the two 'uncommon' procedure types, by dentist, practice, and patient characteristics <sup>a,b</sup>

| Characteristic of the dentist, practice, or patient population | Orthodontic treatment |              |              |       | Surgical periodontal therapy |              |              |        |
|----------------------------------------------------------------|-----------------------|--------------|--------------|-------|------------------------------|--------------|--------------|--------|
|                                                                | None                  | Occasionally | Routinely    | Total | None                         | Occasionally | Routinely    | Total  |
| Dentist gender                                                 |                       |              |              |       |                              |              |              |        |
| Male                                                           | 1122 (66.2)           | 393 (23.2)   | 179 (10.6)   | 1694  | 1085 (64.4)                  | 492 (29.2)   | 109 (6.5)    | 1686   |
| Female                                                         | 434 (71.3)            | 137 (22.5)   | 38 (6.2)     | 609   | 487 (80.0)                   | 105 (17.2)   | 17 (2.8)     | 609    |
| Missing/Blank                                                  | 9                     | 2            | 0            | 64    | 6                            | 4            | 1            | 72     |
| P-value                                                        |                       |              |              | 0.004 |                              |              |              | <.0001 |
| Dentist age in years                                           |                       |              |              |       |                              |              |              |        |
| Mean (S.D.)                                                    | 51.1 ( 12.3)          | 50.6 ( 11.7) | 52.8 ( 10.7) |       | 50.1 ( 12.2)                 | 52.7 ( 11.4) | 55.2 ( 10.8) |        |
| P-value                                                        |                       |              |              | 0.086 |                              |              |              | <.0001 |
| Dentist Hispanic/Latino ethnicity                              |                       |              |              |       |                              |              |              |        |
| Yes                                                            | 66 (57.9)             | 30 (26.3)    | 18 (15.8)    | 114   | 72 (63.7)                    | 35 (31.0)    | 6 (5.3)      | 113    |
| No                                                             | 1480 (68.1)           | 495 (22.8)   | 198 (9.1)    | 2173  | 1490 (68.8)                  | 555 (25.6)   | 121 (5.6)    | 2166   |
| Missing/Blank                                                  | 19                    | 7            | 1            | 80    | 16                           | 11           | 0            | 88     |
| P-value                                                        |                       |              |              | 0.026 |                              |              |              | 0.438  |
| Dentist race                                                   |                       |              |              |       |                              |              |              |        |
| White/Caucasian                                                | 1309 (67.9)           | 436 (22.6)   | 182 (9.4)    | 1927  | 1319 (68.7)                  | 498 (25.9)   | 104 (5.4)    | 1921   |
| Black/African-American                                         | 75 (67.6)             | 30 (27.0)    | 6 (5.4)      | 111   | 63 (57.3)                    | 37 (33.6)    | 10 (9.1)     | 110    |
| American Indian/Alaska Native                                  | 4 (66.7)              | 1 (16.7)     | 1 (16.7)     | 6     | 6 (100)                      | 0 (0.0)      | 0 (0.0)      | 6      |
| Asian                                                          | 112 (64.7)            | 44 (25.4)    | 17 (9.8)     | 173   | 123 (71.5)                   | 38 (22.1)    | 11 (6.4)     | 172    |
| Native Hawaiian/Pacific Islander                               | 2 (100)               | 0 (0.0)      | 0 (0.0)      | 2     | 2 (100)                      | 0 (0.0)      | 0 (0.0)      | 2      |
| Other                                                          | 42 (62.7)             | 15 (22.4)    | 10 (14.9)    | 67    | 43 (64.2)                    | 22 (32.8)    | 2 (3.0)      | 67     |
| Missing/Blank                                                  | 21                    | 6            | 1            | 81    | 22                           | 6            | 0            | 89     |
| P-value                                                        |                       |              |              | 0.621 |                              |              |              | 0.163  |
| Year of graduation from dental school                          |                       |              |              |       |                              |              |              |        |
| Mean (S.D.)                                                    | 1989 ( 12.7)          | 1990 ( 12.2) | 1988 ( 11.2) |       | 1990 ( 12.6)                 | 1988 ( 12.2) | 1985 ( 11.4) |        |
| P-value                                                        |                       |              |              | 0.072 |                              |              |              | <.0001 |

| Characteristic of the dentist, practice, or patient population | Orthodontic treatment |              |            |        | Surgical periodontal therapy |              |           |        |
|----------------------------------------------------------------|-----------------------|--------------|------------|--------|------------------------------|--------------|-----------|--------|
|                                                                | None                  | Occasionally | Routinely  | Total  | None                         | Occasionally | Routinely | Total  |
| After dental school: No formal training program                |                       |              |            |        |                              |              |           |        |
| Yes                                                            | 758 (74.8)            | 189 (18.7)   | 66 (6.5)   | 1013   | 778 (77.0)                   | 197 (19.5)   | 35 (3.5)  | 1010   |
| No                                                             | 807 (62.0)            | 343 (26.4)   | 151 (11.6) | 1301   | 800 (61.7)                   | 404 (31.2)   | 92 (7.1)  | 1296   |
| Missing/Blank                                                  | 0                     | 0            | 0          | 53     | 0                            | 0            | 0         | 61     |
| P-value                                                        |                       |              |            | <.0001 |                              |              |           | <.0001 |
| After dental school: Completed an AEGD program                 |                       |              |            |        |                              |              |           |        |
| Yes                                                            | 148 (67.3)            | 50 (22.7)    | 22 (10.0)  | 220    | 135 (61.6)                   | 71 (32.4)    | 13 (5.9)  | 219    |
| No                                                             | 1417 (67.7)           | 482 (23.0)   | 195 (9.3)  | 2094   | 1443 (69.1)                  | 530 (25.4)   | 114 (5.5) | 2087   |
| Missing/Blank                                                  | 0                     | 0            | 0          | 53     | 0                            | 0            | 0         | 61     |
| P-value                                                        |                       |              |            | 0.929  |                              |              |           | 0.063  |
| After dental school: Completed a GPR program                   |                       |              |            |        |                              |              |           |        |
| Yes                                                            | 363 (70.6)            | 121 (23.5)   | 30 (5.8)   | 514    | 315 (61.9)                   | 159 (31.2)   | 35 (6.9)  | 509    |
| No                                                             | 1202 (66.8)           | 411 (22.8)   | 187 (10.4) | 1800   | 1263 (70.3)                  | 442 (24.6)   | 92 (5.1)  | 1797   |
| Missing/Blank                                                  | 0                     | 0            | 0          | 53     | 0                            | 0            | 0         | 61     |
| P-value                                                        |                       |              |            | 0.004  |                              |              |           | 0.001  |
| After dental school: I am a FAGD                               |                       |              |            |        |                              |              |           |        |
| Yes                                                            | 187 (57.9)            | 94 (29.1)    | 42 (13.0)  | 323    | 177 (55.1)                   | 119 (37.1)   | 25 (7.8)  | 321    |
| No                                                             | 1378 (69.2)           | 438 (22.0)   | 175 (8.8)  | 1991   | 1401 (70.6)                  | 482 (24.3)   | 102 (5.1) | 1985   |
| Missing/Blank                                                  | 0                     | 0            | 0          | 53     | 0                            | 0            | 0         | 61     |
| P-value                                                        |                       |              |            | 0.0002 |                              |              |           | <.0001 |
| After dental school: Completed MAGD                            |                       |              |            |        |                              |              |           |        |
| Yes                                                            | 84 (63.6)             | 36 (27.3)    | 12 (9.1)   | 132    | 62 (47.0)                    | 57 (43.2)    | 13 (9.8)  | 132    |
| No                                                             | 1481 (67.9)           | 496 (22.7)   | 205 (9.4)  | 2182   | 1516 (69.7)                  | 544 (25.0)   | 114 (5.2) | 2174   |
| Missing/Blank                                                  | 0                     | 0            | 0          | 53     | 0                            | 0            | 0         | 61     |
| P-value                                                        |                       |              |            | 0.464  |                              |              |           | <.0001 |

| Characteristic of the dentist, practice, or patient population | Orthodontic treatment |              |            |        | Surgical periodontal therapy |              |           |        |
|----------------------------------------------------------------|-----------------------|--------------|------------|--------|------------------------------|--------------|-----------|--------|
|                                                                | None                  | Occasionally | Routinely  | Total  | None                         | Occasionally | Routinely | Total  |
| After dental school: Completed some other training program     |                       |              |            |        |                              |              |           |        |
| Yes                                                            | 270 (53.3)            | 152 (30.0)   | 85 (16.8)  | 507    | 285 (56.7)                   | 172 (34.2)   | 46 (9.1)  | 503    |
| No                                                             | 1295 (71.7)           | 380 (21.0)   | 132 (7.3)  | 1807   | 1293 (71.7)                  | 429 (23.8)   | 81 (4.5)  | 1803   |
| Missing/Blank                                                  | 0                     | 0            | 0          | 53     | 0                            | 0            | 0         | 61     |
| P-value                                                        |                       |              |            | <.0001 |                              |              |           | <.0001 |
| Member of: American Dental Association                         |                       |              |            |        |                              |              |           |        |
| Yes                                                            | 1223 (67.2)           | 428 (23.5)   | 169 (9.3)  | 1820   | 1227 (67.6)                  | 481 (26.5)   | 107 (5.9) | 1815   |
| No                                                             | 342 (69.2)            | 104 (21.1)   | 48 (9.7)   | 494    | 351 (71.5)                   | 120 (24.4)   | 20 (4.1)  | 491    |
| Missing/Blank                                                  | 0                     | 0            | 0          | 53     | 0                            | 0            | 0         | 61     |
| P-value                                                        |                       |              |            | 0.502  |                              |              |           | 0.153  |
| Member of: Academy of General Dentistry                        |                       |              |            |        |                              |              |           |        |
| Yes                                                            | 531 (60.3)            | 243 (27.6)   | 107 (12.1) | 881    | 557 (63.5)                   | 266 (30.3)   | 54 (6.2)  | 877    |
| No                                                             | 1034 (72.2)           | 289 (20.2)   | 110 (7.7)  | 1433   | 1021 (71.4)                  | 335 (23.4)   | 73 (5.1)  | 1429   |
| Missing/Blank                                                  | 0                     | 0            | 0          | 53     | 0                            | 0            | 0         | 61     |
| P-value                                                        |                       |              |            | <.0001 |                              |              |           | <.0001 |
| Hours in practice in patient contact                           |                       |              |            |        |                              |              |           |        |
| 32 or more hours                                               | 1259 (65.4)           | 468 (24.3)   | 197 (10.2) | 1924   | 1263 (66.0)                  | 537 (28.1)   | 114 (6.0) | 1914   |
| Less than 32 hours                                             | 294 (79.2)            | 61 (16.4)    | 16 (4.3)   | 371    | 304 (81.5)                   | 58 (15.5)    | 11 (2.9)  | 373    |
| Missing/Blank                                                  | 12                    | 3            | 4          | 72     | 11                           | 6            | 2         | 80     |
| P-value                                                        |                       |              |            | <.0001 |                              |              |           | <.0001 |
| Number of different locations at which you see patients        |                       |              |            |        |                              |              |           |        |
| 1 location                                                     | 1334 (67.9)           | 451 (23.0)   | 179 (9.1)  | 1964   | 1361 (69.5)                  | 499 (25.5)   | 98 (5.0)  | 1958   |
| 2 locations                                                    | 177 (63.9)            | 69 (24.9)    | 31 (11.2)  | 277    | 175 (63.6)                   | 78 (28.4)    | 22 (8.0)  | 275    |
| 3 locations                                                    | 31 (72.1)             | 8 (18.6)     | 4 (9.3)    | 43     | 25 (58.1)                    | 13 (30.2)    | 5 (11.6)  | 43     |
| More than 3                                                    | 23 (76.7)             | 4 (13.3)     | 3 (10.0)   | 30     | 17 (56.7)                    | 11 (36.7)    | 2 (6.7)   | 30     |
| Missing/Blank                                                  | 0                     | 0            | 0          | 53     | 0                            | 0            | 0         | 61     |
| P-value                                                        |                       |              |            | 0.644  |                              |              |           | 0.046  |

| Characteristic of the dentist, practice, or patient population                                          | Orthodontic treatment |              |            |        | Surgical periodontal therapy |              |           |        |
|---------------------------------------------------------------------------------------------------------|-----------------------|--------------|------------|--------|------------------------------|--------------|-----------|--------|
|                                                                                                         | None                  | Occasionally | Routinely  | Total  | None                         | Occasionally | Routinely | Total  |
| Practice location                                                                                       |                       |              |            |        |                              |              |           |        |
| Inner City of Urban Area                                                                                | 189 (68.7)            | 60 (21.8)    | 26 (9.5)   | 275    | 183 (67.5)                   | 71 (26.2)    | 17 (6.3)  | 271    |
| Urban (not inner city)                                                                                  | 465 (71.9)            | 133 (20.6)   | 49 (7.6)   | 647    | 449 (69.7)                   | 157 (24.4)   | 38 (5.9)  | 644    |
| Suburban                                                                                                | 649 (64.2)            | 265 (26.2)   | 97 (9.6)   | 1011   | 701 (69.4)                   | 254 (25.1)   | 55 (5.4)  | 1010   |
| Rural                                                                                                   | 256 (69.0)            | 71 (19.1)    | 44 (11.9)  | 371    | 242 (65.2)                   | 113 (30.5)   | 16 (4.3)  | 371    |
| Missing/Blank                                                                                           | 6                     | 3            | 1          | 63     | 3                            | 6            | 1         | 71     |
| P-value                                                                                                 |                       |              |            | 0.010  |                              |              |           | 0.414  |
| Type of main practice (full)                                                                            |                       |              |            |        |                              |              |           |        |
| Owner of private practice                                                                               | 984 (60.0)            | 459 (28.0)   | 197 (12.0) | 1640   | 1046 (64.2)                  | 482 (29.6)   | 102 (6.3) | 1630   |
| Associate or employee of a private practice                                                             | 249 (78.8)            | 54 (17.1)    | 13 (4.1)   | 316    | 247 (78.4)                   | 56 (17.8)    | 12 (3.8)  | 315    |
| HealthPartners Dental Group                                                                             | 49 (96.1)             | 0 (0.0)      | 2 (3.9)    | 51     | 40 (78.4)                    | 9 (17.6)     | 2 (3.9)   | 51     |
| Permanente Dental Associates                                                                            | 62 (98.4)             | 1 (1.6)      | 0 (0.0)    | 63     | 53 (84.1)                    | 10 (15.9)    | 0 (0.0)   | 63     |
| Other managed care or preferred provider organization                                                   | 14 (82.4)             | 1 (5.9)      | 2 (11.8)   | 17     | 15 (88.2)                    | 1 (5.9)      | 1 (5.9)   | 17     |
| Public health practice, community health center, or publicly-funded clinic (but not a federal facility) | 112 (96.6)            | 3 (2.6)      | 1 (0.9)    | 116    | 94 (79.0)                    | 18 (15.1)    | 7 (5.9)   | 119    |
| Federal government facility (VA, DoD, Public Health Service)                                            | 34 (89.5)             | 3 (7.9)      | 1 (2.6)    | 38     | 24 (63.2)                    | 13 (34.2)    | 1 (2.6)   | 38     |
| Dental school, academic institution, or facility staffed by dental school                               | 57 (86.4)             | 8 (12.1)     | 1 (1.5)    | 66     | 53 (80.3)                    | 11 (16.7)    | 2 (3.0)   | 66     |
| Missing/Blank                                                                                           | 4                     | 3            | 0          | 60     | 6                            | 1            | 0         | 68     |
| P-value                                                                                                 |                       |              |            | <.0001 |                              |              |           | <.0001 |
| Type of main practice (private)                                                                         |                       |              |            |        |                              |              |           |        |
| Private                                                                                                 | 1358 (65.1)           | 515 (24.7)   | 214 (10.3) | 2087   | 1401 (67.5)                  | 558 (26.9)   | 117 (5.6) | 2076   |
| Non private                                                                                             | 203 (92.3)            | 14 (6.4)     | 3 (1.4)    | 220    | 171 (76.7)                   | 42 (18.8)    | 10 (4.5)  | 223    |
| Missing/Blank                                                                                           | 4                     | 3            | 0          | 60     | 6                            | 1            | 0         | 68     |
| P-value                                                                                                 |                       |              |            | <.0001 |                              |              |           | 0.016  |
| At the same location: Not applicable-only GDs at this location                                          |                       |              |            |        |                              |              |           |        |
| Yes                                                                                                     | 1270 (66.0)           | 470 (24.4)   | 185 (9.6)  | 1925   | 1277 (66.6)                  | 530 (27.6)   | 110 (5.7) | 1917   |

| Characteristic of the dentist, practice, or patient population | Orthodontic treatment |              |            |        | Surgical periodontal therapy |              |            |        |
|----------------------------------------------------------------|-----------------------|--------------|------------|--------|------------------------------|--------------|------------|--------|
|                                                                | None                  | Occasionally | Routinely  | Total  | None                         | Occasionally | Routinely  | Total  |
| No                                                             | 295 (75.8)            | 62 (15.9)    | 32 ( 8.2)  | 389    | 301 (77.4)                   | 71 (18.3)    | 17 ( 4.4)  | 389    |
| Missing/Blank                                                  | 0                     | 0            | 0          | 53     | 0                            | 0            | 0          | 61     |
| P-value                                                        |                       |              |            | 0.0003 |                              |              |            | 0.0001 |
| <b>At the same location: Endodontist</b>                       |                       |              |            |        |                              |              |            |        |
| Yes                                                            | 88 (80.0)             | 15 (13.6)    | 7 ( 6.4)   | 110    | 91 (82.0)                    | 13 (11.7)    | 7 ( 6.3)   | 111    |
| No                                                             | 1477 (67.0)           | 517 (23.5)   | 210 ( 9.5) | 2204   | 1487 (67.7)                  | 588 (26.8)   | 120 ( 5.5) | 2195   |
| Missing/Blank                                                  | 0                     | 0            | 0          | 53     | 0                            | 0            | 0          | 61     |
| P-value                                                        |                       |              |            | 0.016  |                              |              |            | 0.001  |
| <b>At the same location: Oral &amp; Maxillofacial Surgeon</b>  |                       |              |            |        |                              |              |            |        |
| Yes                                                            | 79 (88.8)             | 4 ( 4.5)     | 6 ( 6.7)   | 89     | 72 (79.1)                    | 14 (15.4)    | 5 ( 5.5)   | 91     |
| No                                                             | 1486 (66.8)           | 528 (23.7)   | 211 ( 9.5) | 2225   | 1506 (68.0)                  | 587 (26.5)   | 122 ( 5.5) | 2215   |
| Missing/Blank                                                  | 0                     | 0            | 0          | 53     | 0                            | 0            | 0          | 61     |
| P-value                                                        |                       |              |            | <.0001 |                              |              |            | 0.047  |
| <b>At the same location: Orthodontist</b>                      |                       |              |            |        |                              |              |            |        |
| Yes                                                            | 102 (84.3)            | 12 ( 9.9)    | 7 ( 5.8)   | 121    | 97 (78.9)                    | 19 (15.4)    | 7 ( 5.7)   | 123    |
| No                                                             | 1463 (66.7)           | 520 (23.7)   | 210 ( 9.6) | 2193   | 1481 (67.8)                  | 582 (26.7)   | 120 ( 5.5) | 2183   |
| Missing/Blank                                                  | 0                     | 0            | 0          | 53     | 0                            | 0            | 0          | 61     |
| P-value                                                        |                       |              |            | <.0001 |                              |              |            | 0.014  |
| <b>At the same location: Pediatric dentist</b>                 |                       |              |            |        |                              |              |            |        |
| Yes                                                            | 79 (80.6)             | 13 (13.3)    | 6 ( 6.1)   | 98     | 79 (79.8)                    | 16 (16.2)    | 4 ( 4.0)   | 99     |
| No                                                             | 1486 (67.1)           | 519 (23.4)   | 211 ( 9.5) | 2216   | 1499 (67.9)                  | 585 (26.5)   | 123 ( 5.6) | 2207   |
| Missing/Blank                                                  | 0                     | 0            | 0          | 53     | 0                            | 0            | 0          | 61     |
| P-value                                                        |                       |              |            | 0.017  |                              |              |            | 0.038  |
| <b>At the same location: Periodontist</b>                      |                       |              |            |        |                              |              |            |        |
| Yes                                                            | 105 (75.0)            | 28 (20.0)    | 7 ( 5.0)   | 140    | 117 (81.8)                   | 22 (15.4)    | 4 ( 2.8)   | 143    |
| No                                                             | 1460 (67.2)           | 504 (23.2)   | 210 ( 9.7) | 2174   | 1461 (67.5)                  | 579 (26.8)   | 123 ( 5.7) | 2163   |
| Missing/Blank                                                  | 0                     | 0            | 0          | 53     | 0                            | 0            | 0          | 61     |



| Characteristic of the dentist, practice, or patient population         | Orthodontic treatment |              |              |        | Surgical periodontal therapy |              |              |       |
|------------------------------------------------------------------------|-----------------------|--------------|--------------|--------|------------------------------|--------------|--------------|-------|
|                                                                        | None                  | Occasionally | Routinely    | Total  | None                         | Occasionally | Routinely    | Total |
| P-value                                                                |                       |              |              | 0.087  |                              |              |              | 0.001 |
| At the same location: Prosthodontist                                   |                       |              |              |        |                              |              |              |       |
| Yes                                                                    | 55 (80.9)             | 11 (16.2)    | 2 (2.9)      | 68     | 51 (72.9)                    | 15 (21.4)    | 4 (5.7)      | 70    |
| No                                                                     | 1510 (67.2)           | 521 (23.2)   | 215 (9.6)    | 2246   | 1527 (68.3)                  | 586 (26.2)   | 123 (5.5)    | 2236  |
| Missing/Blank                                                          | 0                     | 0            | 0            | 53     | 0                            | 0            | 0            | 61    |
| P-value                                                                |                       |              |              | 0.040  |                              |              |              | 0.665 |
| At the same location: Other                                            |                       |              |              |        |                              |              |              |       |
| Yes                                                                    | 43 (81.1)             | 5 (9.4)      | 5 (9.4)      | 53     | 33 (64.7)                    | 12 (23.5)    | 6 (11.8)     | 51    |
| No                                                                     | 1522 (67.3)           | 527 (23.3)   | 212 (9.4)    | 2261   | 1545 (68.5)                  | 589 (26.1)   | 121 (5.4)    | 2255  |
| Missing/Blank                                                          | 0                     | 0            | 0            | 53     | 0                            | 0            | 0            | 61    |
| P-value                                                                |                       |              |              | 0.042  |                              |              |              | 0.150 |
| How long a patient has to wait: for a new patient exam appt in days    |                       |              |              |        |                              |              |              |       |
| Mean (S.D.)                                                            | 8.2 ( 13.9)           | 5.5 ( 6.6)   | 4.9 ( 5.9)   |        | 7.7 ( 13.2)                  | 6.6 ( 9.4)   | 6.1 ( 8.9)   |       |
| P-value                                                                |                       |              |              | <.0001 |                              |              |              | 0.094 |
| How long a patient has to wait: for a treatment procedure appt in days |                       |              |              |        |                              |              |              |       |
| Mean (S.D.)                                                            | 8.0 ( 13.5)           | 5.4 ( 6.4)   | 5.4 ( 6.3)   |        | 7.5 ( 12.9)                  | 6.9 ( 9.2)   | 5.2 ( 6.3)   |       |
| P-value                                                                |                       |              |              | <.0001 |                              |              |              | 0.089 |
| How long a patient has to wait: in the waiting room in mins            |                       |              |              |        |                              |              |              |       |
| Mean (S.D.)                                                            | 8.8 ( 8.5)            | 7.6 ( 6.8)   | 7.6 ( 5.8)   |        | 8.4 ( 7.7)                   | 8.4 ( 8.0)   | 9.6 ( 11.1)  |       |
| P-value                                                                |                       |              |              | 0.002  |                              |              |              | 0.248 |
| Percentage of patients who are: 1-18 years old                         |                       |              |              |        |                              |              |              |       |
| Mean (S.D.)                                                            | 18.3 ( 16.6)          | 15.4 ( 11.2) | 19.3 ( 16.1) |        | 18.4 ( 16.7)                 | 16.2 ( 12.5) | 16.2 ( 11.8) |       |
| P-value                                                                |                       |              |              | 0.0004 |                              |              |              | 0.006 |

| Characteristic of the dentist, practice, or patient population      | Orthodontic treatment |              |              |        | Surgical periodontal therapy |              |              |       |
|---------------------------------------------------------------------|-----------------------|--------------|--------------|--------|------------------------------|--------------|--------------|-------|
|                                                                     | None                  | Occasionally | Routinely    | Total  | None                         | Occasionally | Routinely    | Total |
| Percentage of patients who are: 19-44 years old                     |                       |              |              |        |                              |              |              |       |
| Mean (S.D.)                                                         | 28.6 ( 12.7)          | 29.7 ( 12.0) | 29.2 ( 11.9) |        | 28.9 ( 12.7)                 | 29.0 ( 12.2) | 28.1 ( 10.6) |       |
| P-value                                                             |                       |              |              | 0.193  |                              |              |              | 0.760 |
| Percentage of patients who are: 45-64 years old                     |                       |              |              |        |                              |              |              |       |
| Mean (S.D.)                                                         | 32.8 ( 12.5)          | 35.0 ( 10.7) | 32.7 ( 12.1) |        | 32.9 ( 12.2)                 | 34.2 ( 11.6) | 34.7 ( 13.3) |       |
| P-value                                                             |                       |              |              | 0.001  |                              |              |              | 0.027 |
| Percentage of patients who are: 65 or older                         |                       |              |              |        |                              |              |              |       |
| Mean (S.D.)                                                         | 20.3 ( 12.1)          | 19.9 ( 10.0) | 18.8 ( 11.3) |        | 19.8 ( 11.6)                 | 20.6 ( 11.4) | 21.0 ( 12.2) |       |
| P-value                                                             |                       |              |              | 0.154  |                              |              |              | 0.239 |
| Percentage of patients who are of Hispanic/Latino ethnicity         |                       |              |              |        |                              |              |              |       |
| Mean (S.D.)                                                         | 15.2 ( 19.6)          | 13.2 ( 15.4) | 19.6 ( 22.7) |        | 15.1 ( 19.7)                 | 15.7 ( 18.1) | 14.0 ( 17.2) |       |
| P-value                                                             |                       |              |              | 0.0003 |                              |              |              | 0.637 |
| Percentage of patients whose race is: White/Caucasian               |                       |              |              |        |                              |              |              |       |
| Mean (S.D.)                                                         | 67.9 ( 24.1)          | 70.6 ( 21.3) | 69.3 ( 22.0) |        | 68.8 ( 23.3)                 | 68.5 ( 23.4) | 67.4 ( 22.9) |       |
| P-value                                                             |                       |              |              | 0.067  |                              |              |              | 0.824 |
| Percentage of patients whose race is: Black/African-American        |                       |              |              |        |                              |              |              |       |
| Mean (S.D.)                                                         | 17.5 ( 17.6)          | 15.7 ( 16.2) | 14.8 ( 14.9) |        | 16.5 ( 16.8)                 | 17.3 ( 17.6) | 18.7 ( 17.7) |       |
| P-value                                                             |                       |              |              | 0.024  |                              |              |              | 0.291 |
| Percentage of patients whose race is: American Indian/Alaska Native |                       |              |              |        |                              |              |              |       |
| Mean (S.D.)                                                         | 1.8 ( 7.9)            | 1.2 ( 3.6)   | 1.9 ( 7.1)   |        | 1.5 ( 6.3)                   | 2.1 ( 8.4)   | 1.6 ( 8.5)   |       |
| P-value                                                             |                       |              |              | 0.294  |                              |              |              | 0.274 |

| Characteristic of the dentist, practice, or patient population                                   | Orthodontic treatment |              |              |        | Surgical periodontal therapy |              |              |        |
|--------------------------------------------------------------------------------------------------|-----------------------|--------------|--------------|--------|------------------------------|--------------|--------------|--------|
|                                                                                                  | None                  | Occasionally | Routinely    | Total  | None                         | Occasionally | Routinely    | Total  |
| Percentage of patients whose race is: Asian                                                      |                       |              |              |        |                              |              |              |        |
| Mean (S.D.)                                                                                      | 6.2 ( 7.2)            | 6.8 ( 8.6)   | 6.2 ( 7.6)   |        | 6.4 ( 7.7)                   | 6.3 ( 7.6)   | 6.1 ( 6.6)   |        |
| P-value                                                                                          |                       |              |              | 0.272  |                              |              |              | 0.926  |
| Percentage of patients whose race is: Native Hawaiian/Pacific Islander                           |                       |              |              |        |                              |              |              |        |
| Mean (S.D.)                                                                                      | 0.7 ( 2.3)            | 0.9 ( 2.5)   | 0.8 ( 2.1)   |        | 0.7 ( 2.1)                   | 1.0 ( 2.7)   | 0.8 ( 2.6)   |        |
| P-value                                                                                          |                       |              |              | 0.600  |                              |              |              | 0.053  |
| Percentage of patients whose race is: Other                                                      |                       |              |              |        |                              |              |              |        |
| Mean (S.D.)                                                                                      | 5.9 ( 15.8)           | 4.8 ( 12.3)  | 7.0 ( 13.8)  |        | 6.1 ( 16.0)                  | 4.9 ( 11.9)  | 5.4 ( 13.8)  |        |
| P-value                                                                                          |                       |              |              | 0.137  |                              |              |              | 0.200  |
| Percentage of patients: Covered by a private insurance program                                   |                       |              |              |        |                              |              |              |        |
| Mean (S.D.)                                                                                      | 57.3 ( 26.9)          | 62.8 ( 20.5) | 59.6 ( 20.7) |        | 59.1 ( 26.0)                 | 58.3 ( 23.6) | 56.5 ( 21.5) |        |
| P-value                                                                                          |                       |              |              | <.0001 |                              |              |              | 0.502  |
| Percentage of patients: Covered by a public program                                              |                       |              |              |        |                              |              |              |        |
| Mean (S.D.)                                                                                      | 16.6 ( 25.8)          | 8.7 ( 17.7)  | 10.1 ( 17.8) |        | 15.1 ( 24.4)                 | 12.6 ( 22.5) | 10.9 ( 20.6) |        |
| P-value                                                                                          |                       |              |              | <.0001 |                              |              |              | 0.030  |
| Percentage of patients: Not covered by any third party and pays out of pocket                    |                       |              |              |        |                              |              |              |        |
| Mean (S.D.)                                                                                      | 21.5 ( 17.8)          | 26.0 ( 16.7) | 27.3 ( 16.8) |        | 21.8 ( 17.7)                 | 25.1 ( 17.0) | 29.4 ( 17.6) |        |
| P-value                                                                                          |                       |              |              | <.0001 |                              |              |              | <.0001 |
| Percent of patients: Receiving free care or substantially reduced fees courtesy of this practice |                       |              |              |        |                              |              |              |        |
| Mean (S.D.)                                                                                      | 4.4 ( 12.3)           | 2.5 ( 4.0)   | 3.0 ( 4.6)   |        | 3.9 ( 10.7)                  | 3.9 ( 10.1)  | 3.2 ( 9.5)   |        |
| P-value                                                                                          |                       |              |              | 0.001  |                              |              |              | 0.755  |

| Characteristic of the dentist, practice, or patient population                                  | Orthodontic treatment |              |              |       | Surgical periodontal therapy |              |              |       |
|-------------------------------------------------------------------------------------------------|-----------------------|--------------|--------------|-------|------------------------------|--------------|--------------|-------|
|                                                                                                 | None                  | Occasionally | Routinely    | Total | None                         | Occasionally | Routinely    | Total |
| Percent of patients who come: For one visit only                                                |                       |              |              |       |                              |              |              |       |
| Mean (S.D.)                                                                                     | 8.9 ( 10.9)           | 7.4 ( 6.9)   | 9.1 ( 9.0)   |       | 8.8 ( 10.6)                  | 8.2 ( 8.7)   | 8.0 ( 8.3)   |       |
| P-value                                                                                         |                       |              |              | 0.008 |                              |              |              | 0.337 |
| Percent of patients who come: Occasionally only when they have an emergency or specific problem |                       |              |              |       |                              |              |              |       |
| Mean (S.D.)                                                                                     | 13.3 ( 9.8)           | 12.3 ( 8.9)  | 12.6 ( 9.5)  |       | 13.1 ( 10.0)                 | 13.0 ( 8.7)  | 12.7 ( 8.8)  |       |
| P-value                                                                                         |                       |              |              | 0.078 |                              |              |              | 0.876 |
| Percent of patients who come: Irregularly whether or not they have a problem                    |                       |              |              |       |                              |              |              |       |
| Mean (S.D.)                                                                                     | 16.4 ( 10.9)          | 15.8 ( 9.2)  | 15.6 ( 10.3) |       | 15.9 ( 10.2)                 | 16.9 ( 10.6) | 16.5 ( 12.3) |       |
| P-value                                                                                         |                       |              |              | 0.339 |                              |              |              | 0.166 |
| Percent of patients who come: Regularly as recommended or whether or not they have a problem    |                       |              |              |       |                              |              |              |       |
| Mean (S.D.)                                                                                     | 61.3 ( 20.4)          | 64.5 ( 17.2) | 62.7 ( 19.2) |       | 62.1 ( 19.8)                 | 62.0 ( 19.1) | 62.8 ( 20.3) |       |
| P-value                                                                                         |                       |              |              | 0.005 |                              |              |              | 0.914 |

<sup>a</sup> This table is limited to the 2,367 GDs who reported their generalist/specialist status. This includes enrollments as of October 31, 2013.

<sup>b</sup> P-values for the association between the characteristic and the procedure computed using Fisher's exact test (for categorical variables) and analysis of variance (for numerical variables).

GD: general dentist  
 AEGD: Advanced Education in General Dentistry  
 GPR: General Practice Residency  
 FAGD: Fellow of the Academy of General Dentistry  
 MAGD: Master of the Academy of General Dentistry
